# Supplementary material for: A chromosome-level assembly of the Atlantic herring genome—detection of a supergene and other signals of selection
Source: PubMed Central journal article supplement — Genome Res. 2019 Nov;29(11):1919–28. doi: 10.1101/gr.253435.119 (PMC6836730; doi:10.1101/gr.253435.119), 2019-11

**Figure S1:** Linkage map and recombination-rate profile (dots) estimated using LD-hat for Chromosome 1-26. Solid-line: sex-average linkage map, dashed line: male linkage map, dotted line: female linkage map.

# Chromosome 1

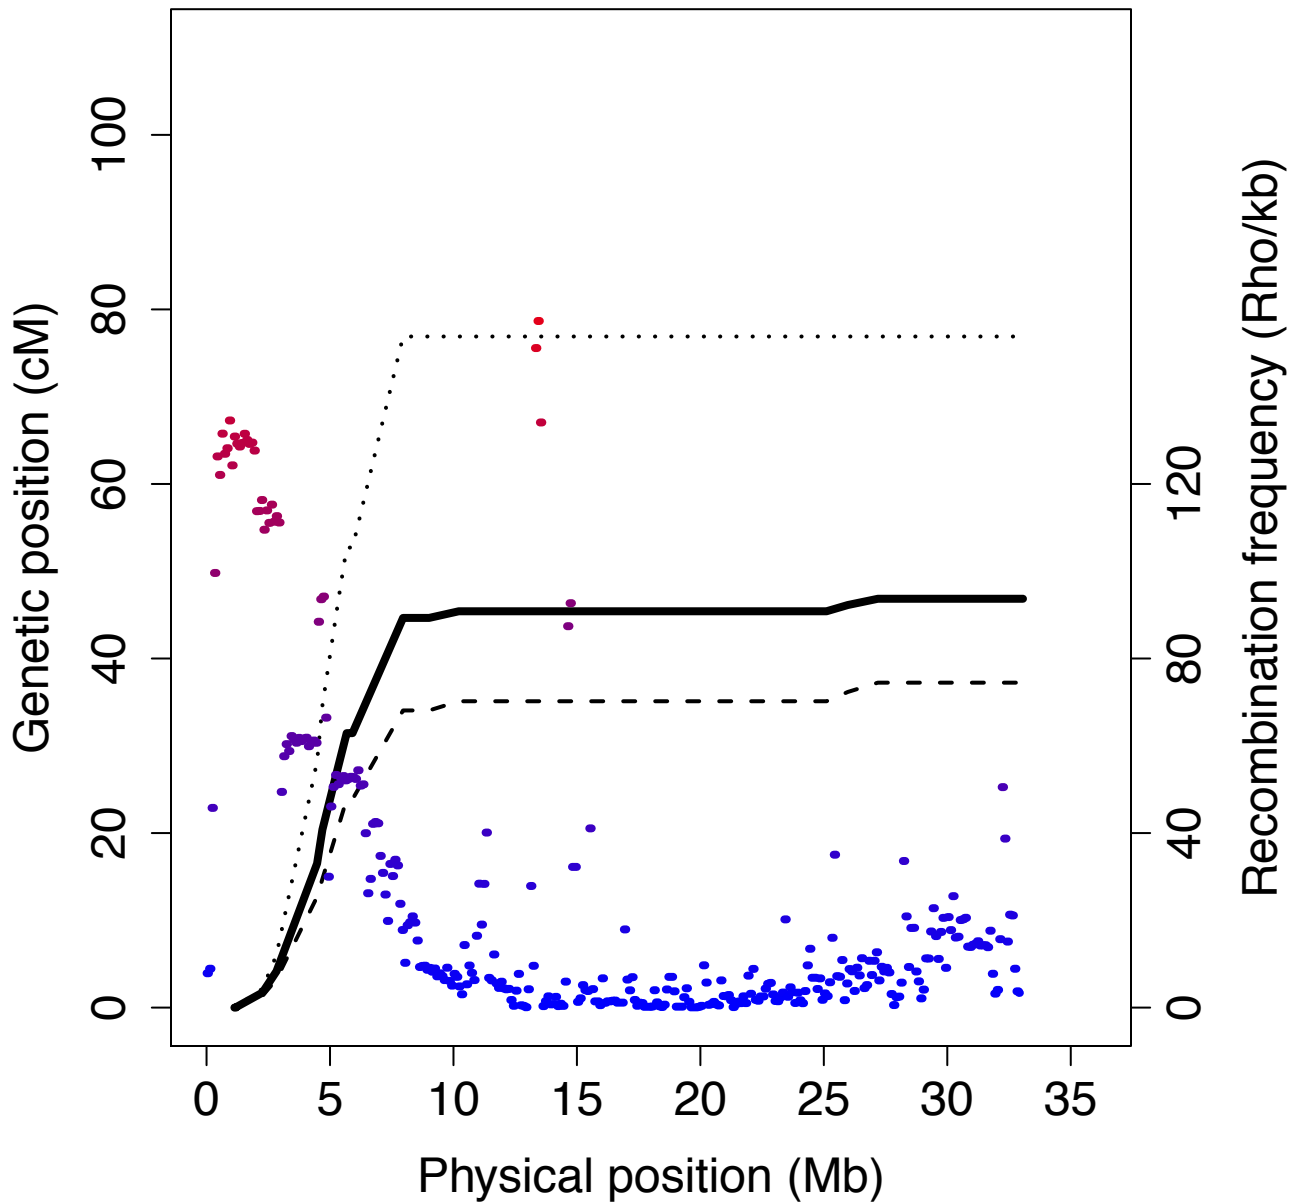

# Chromosome 2

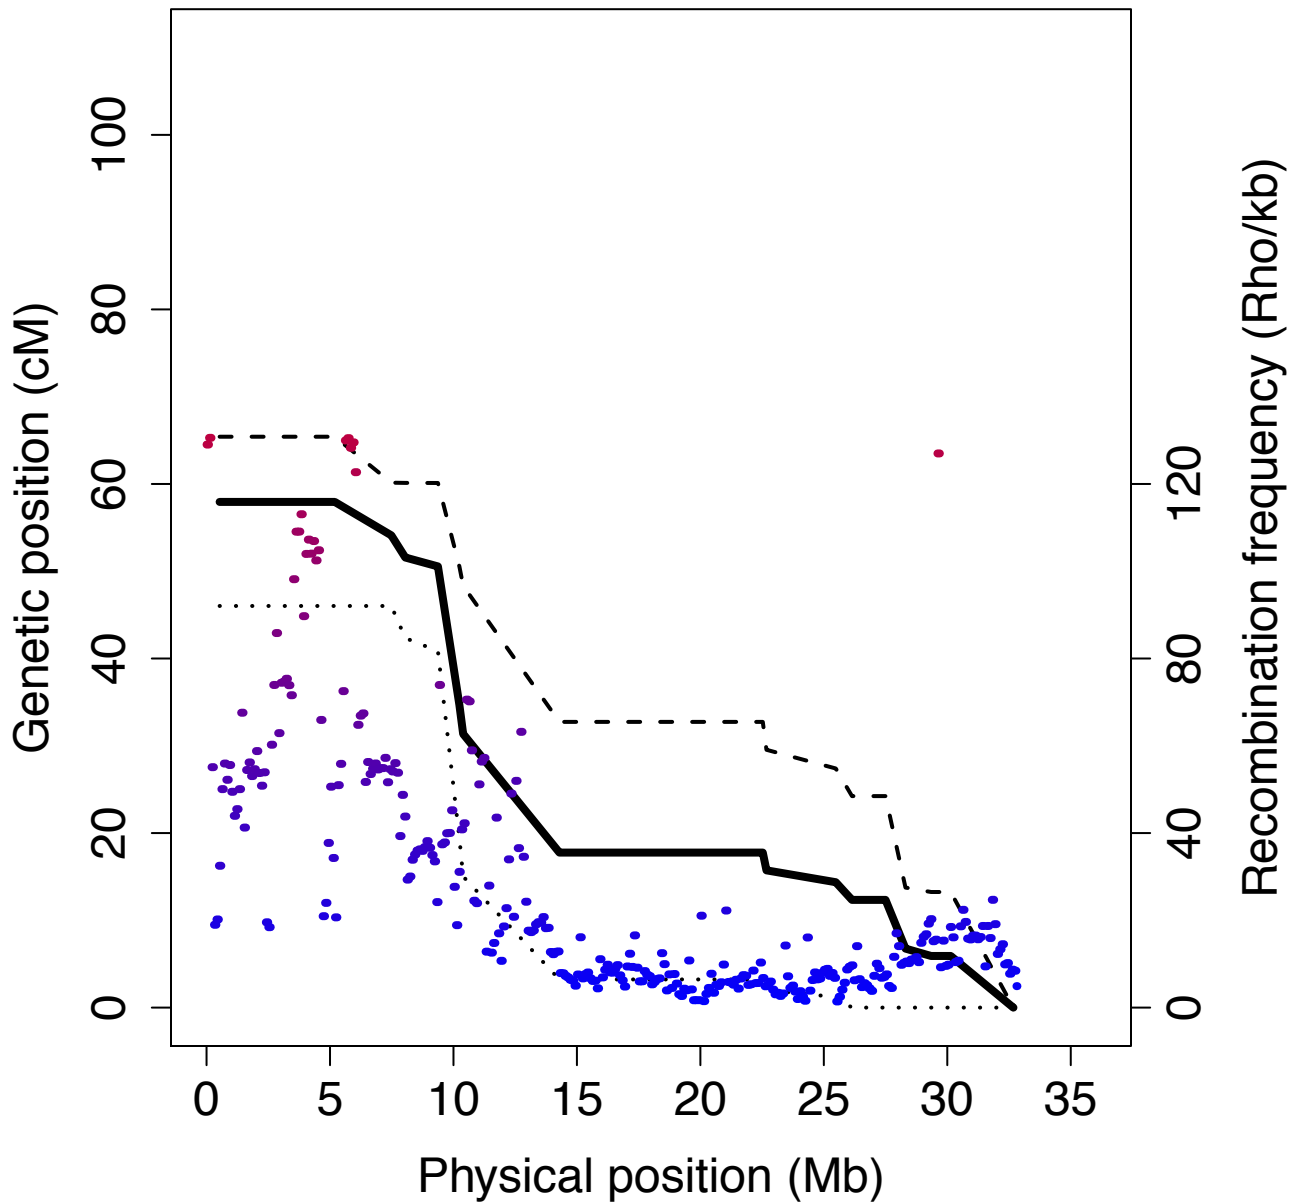

# Chromosome 3

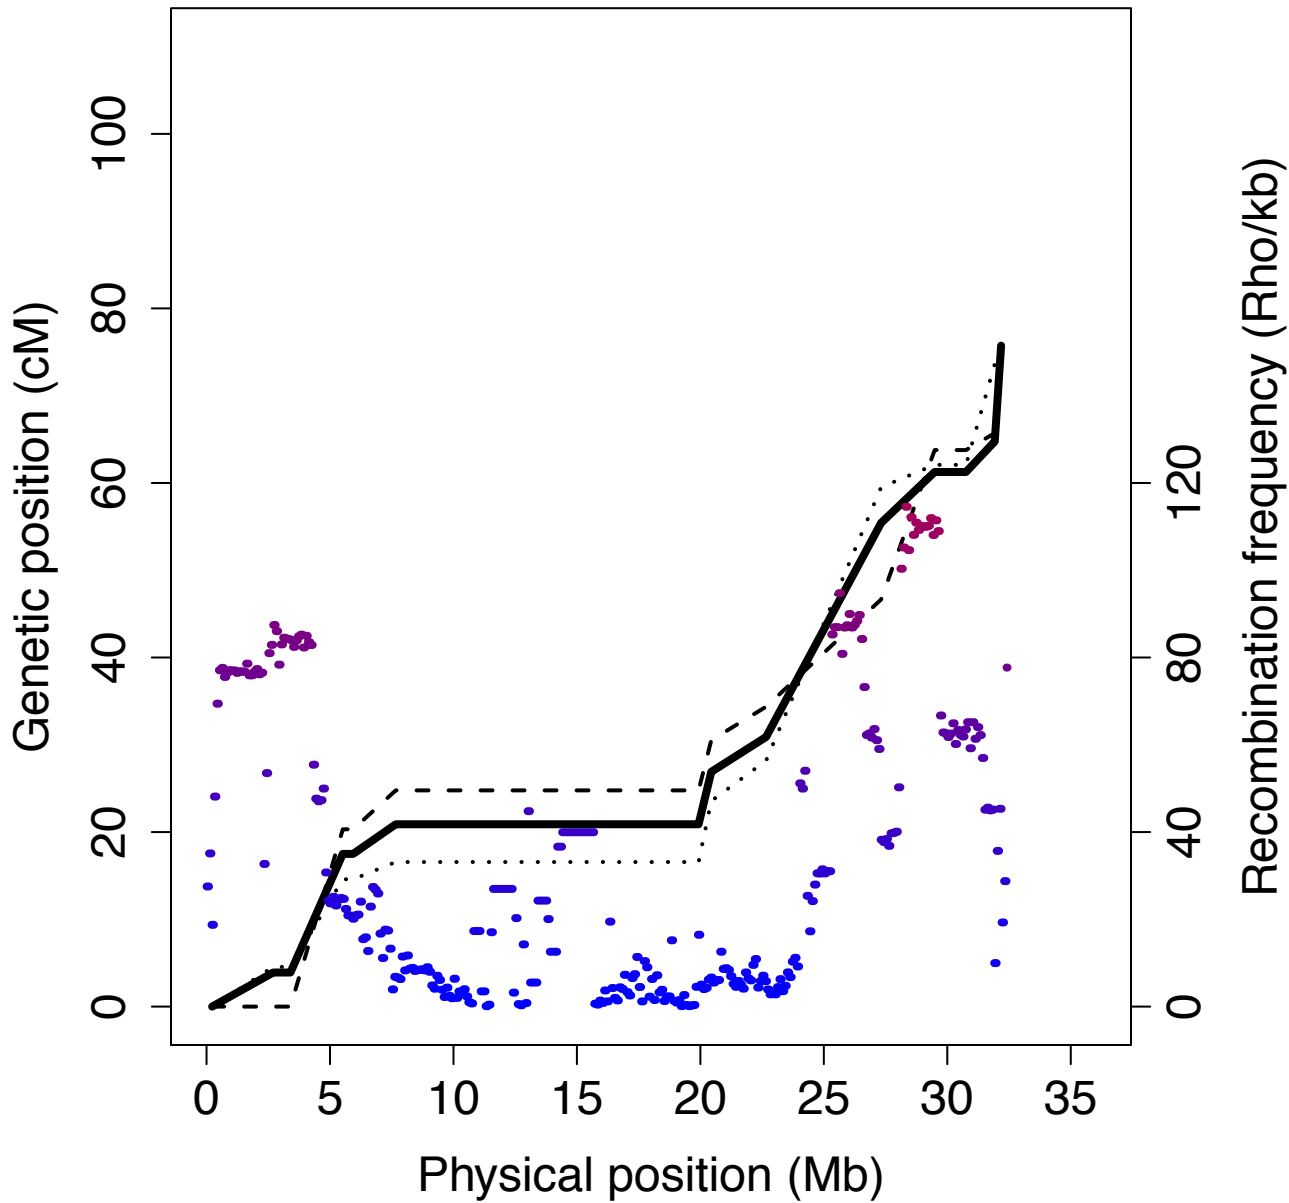

# Chromosome 4

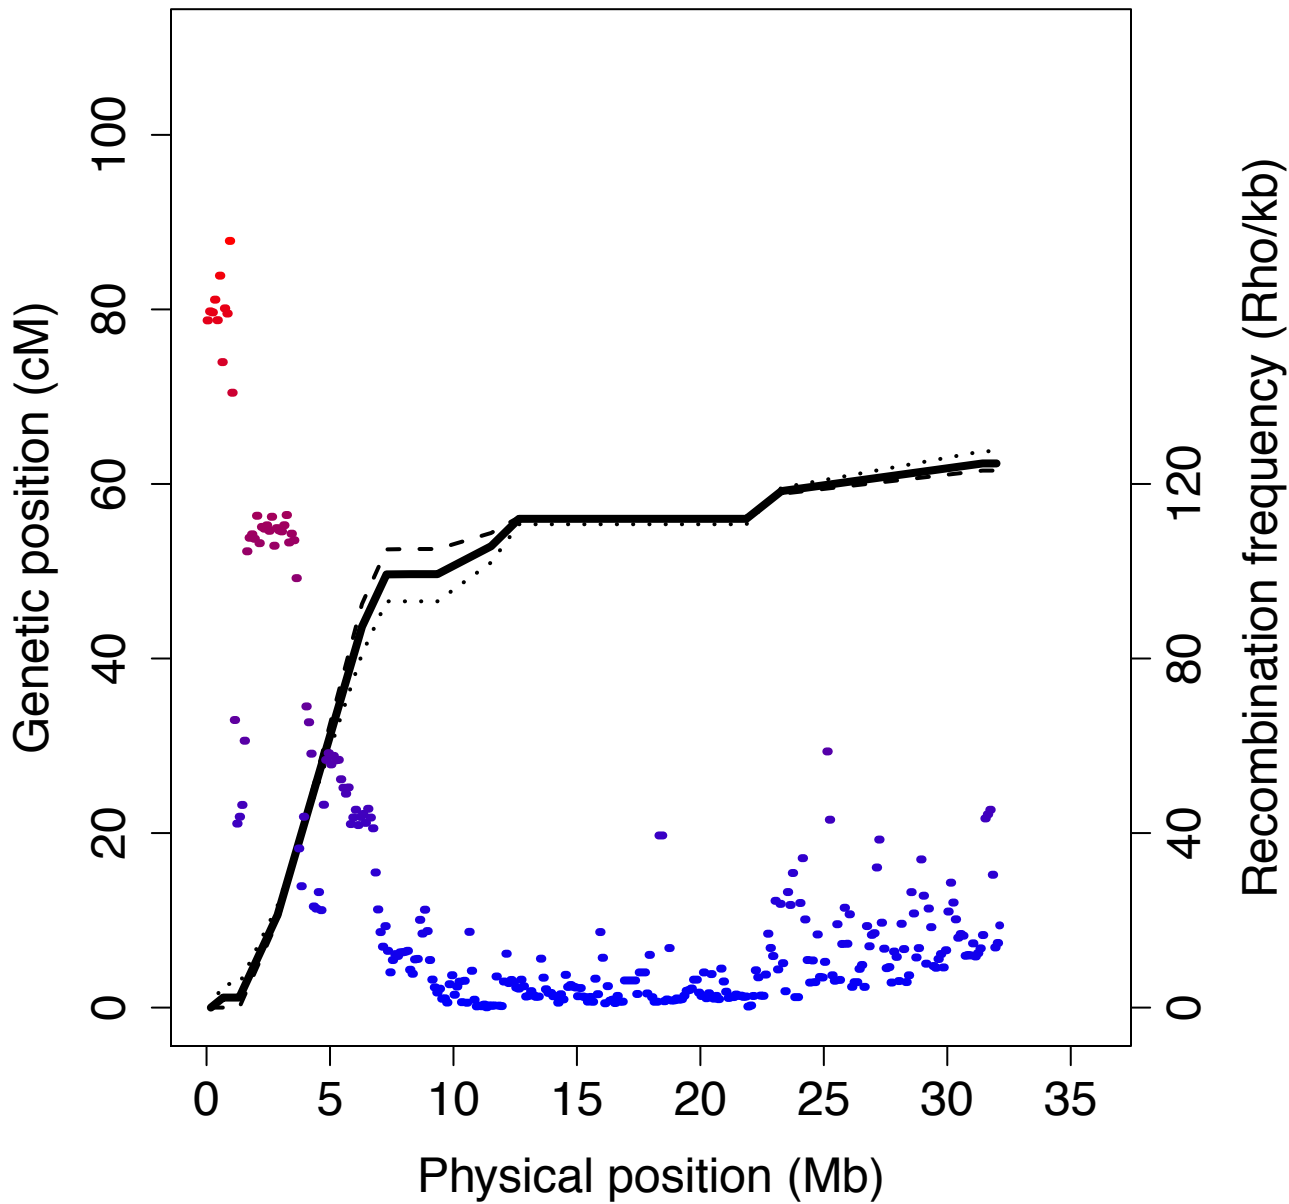

# Chromosome 5

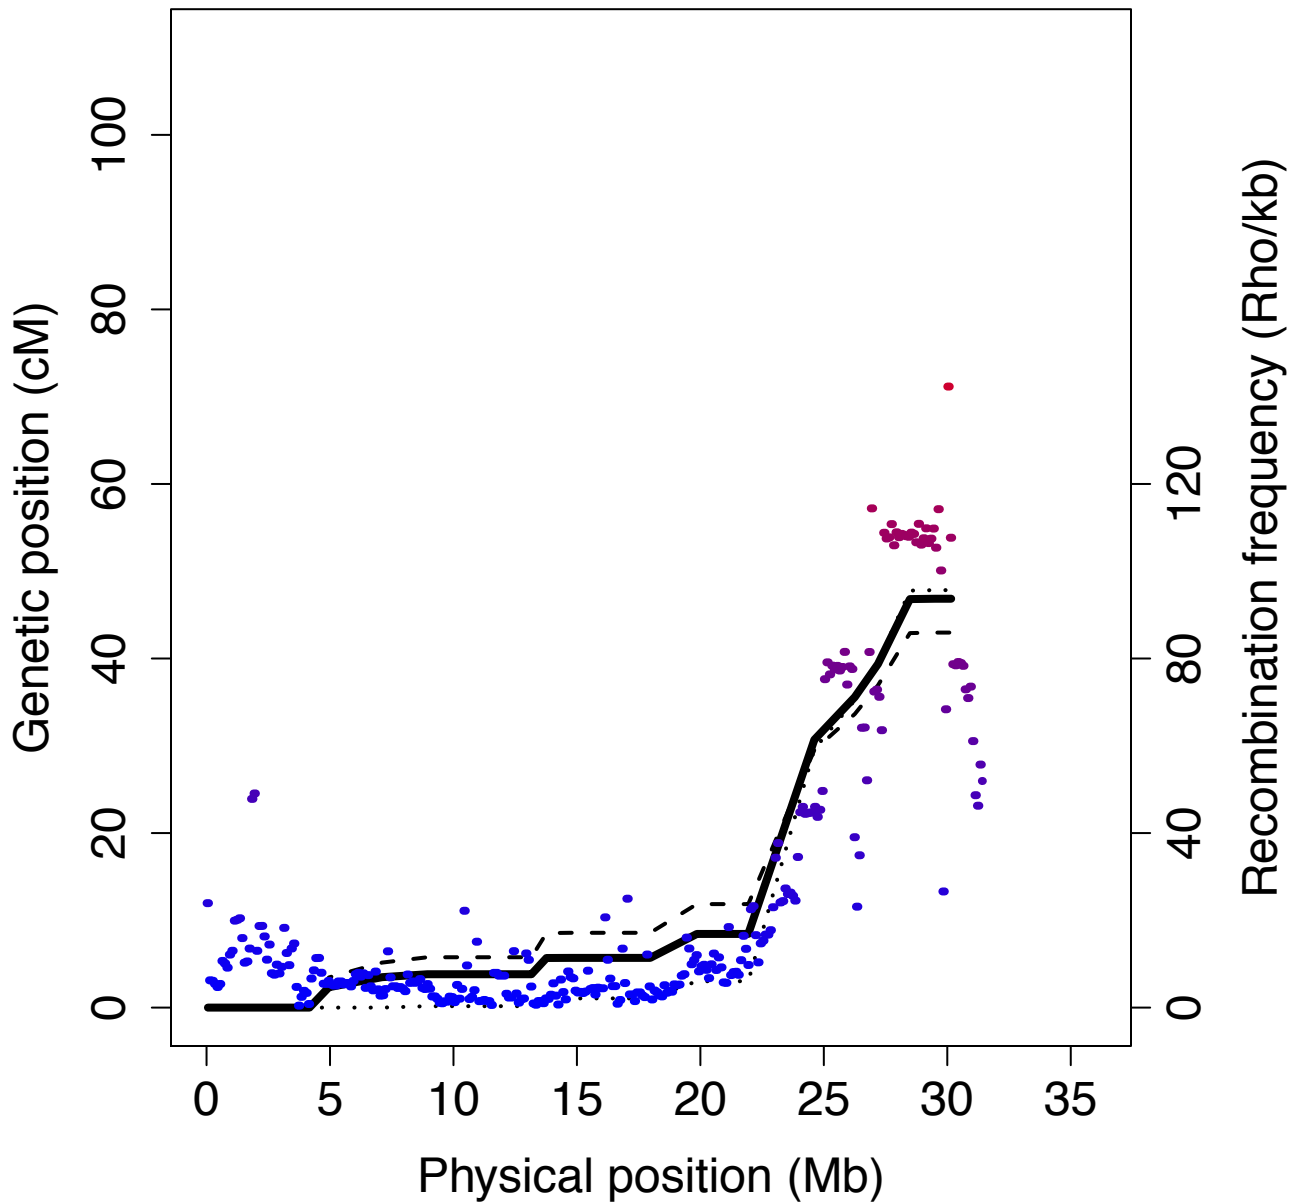

# Chromosome 6

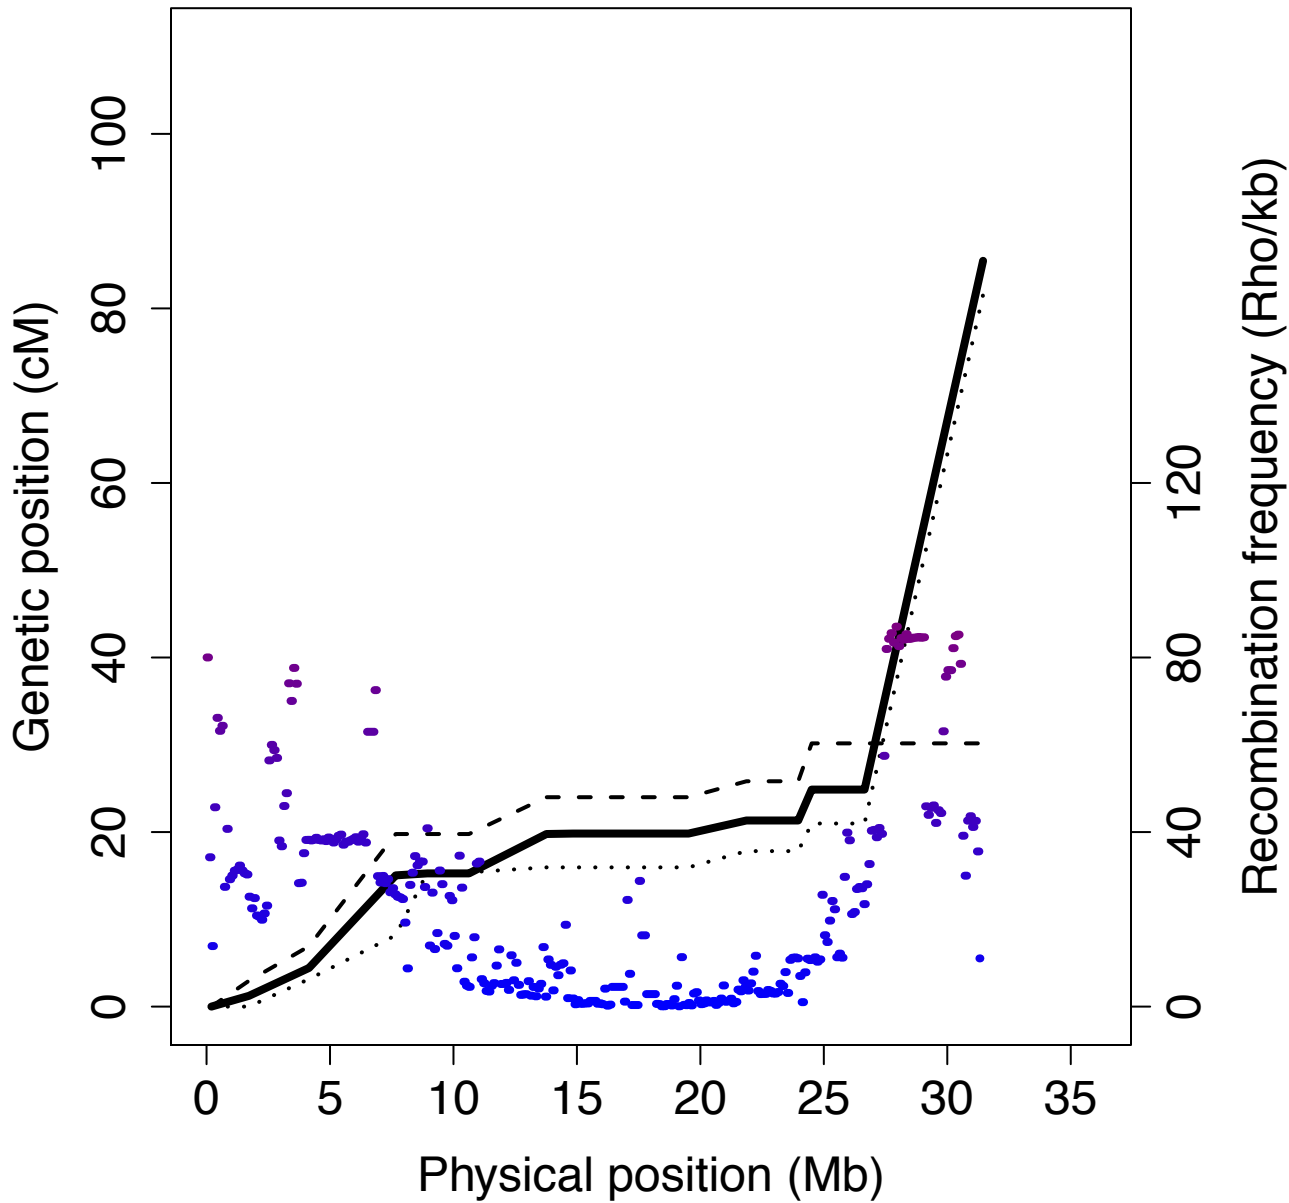

# Chromosome 7

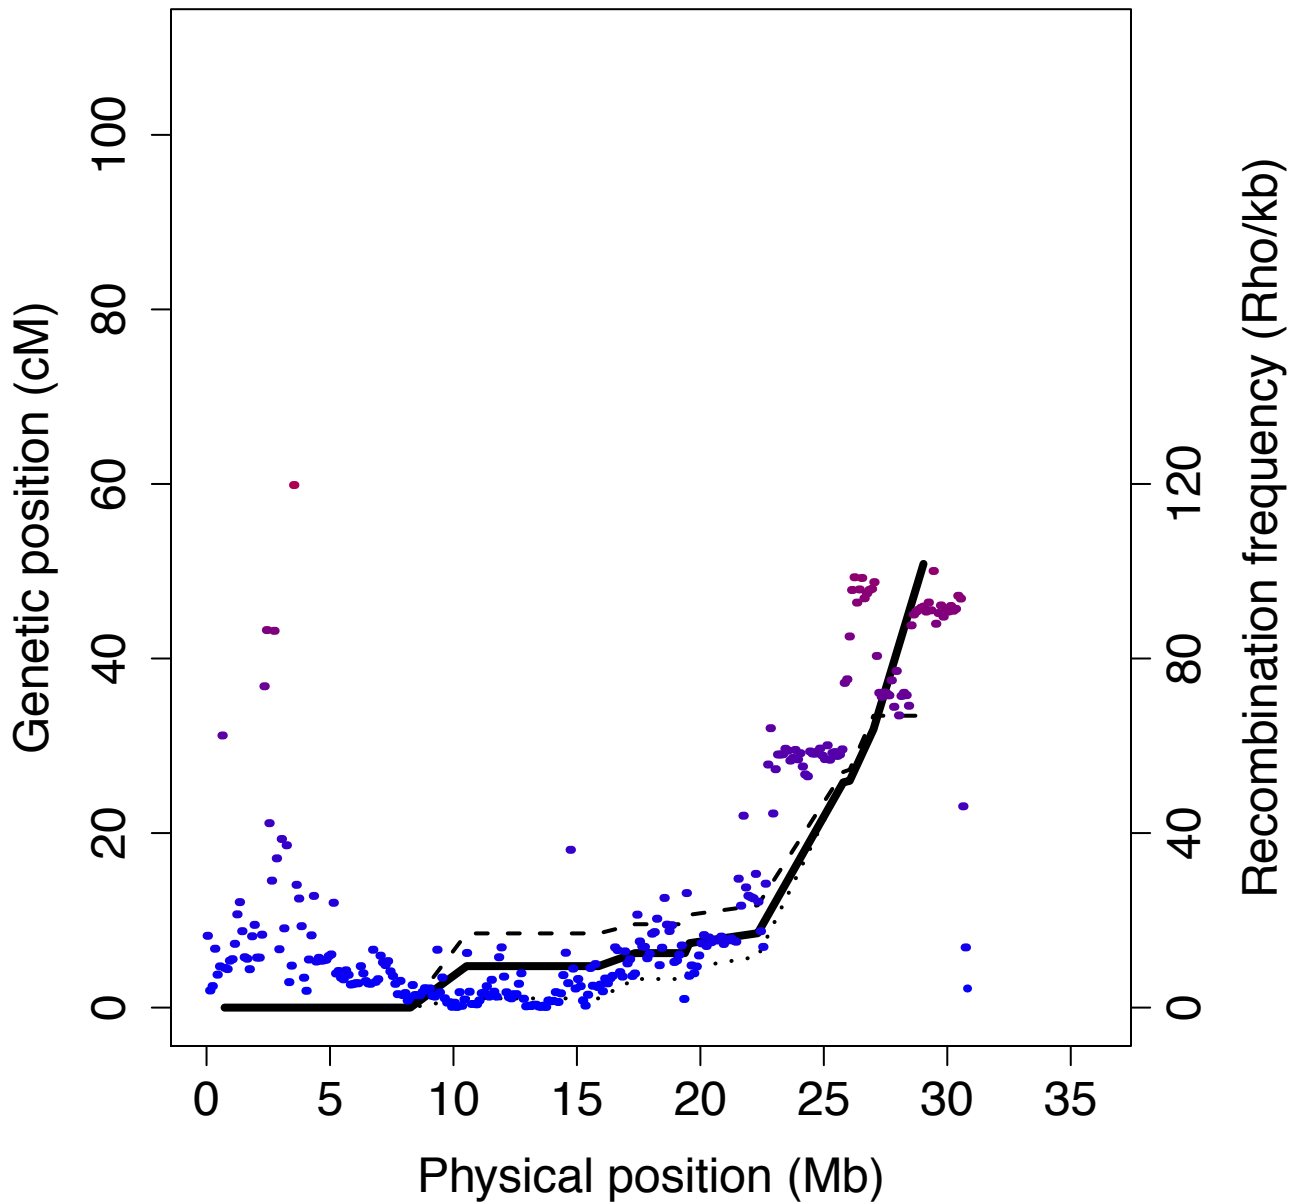



# Chromosome 8

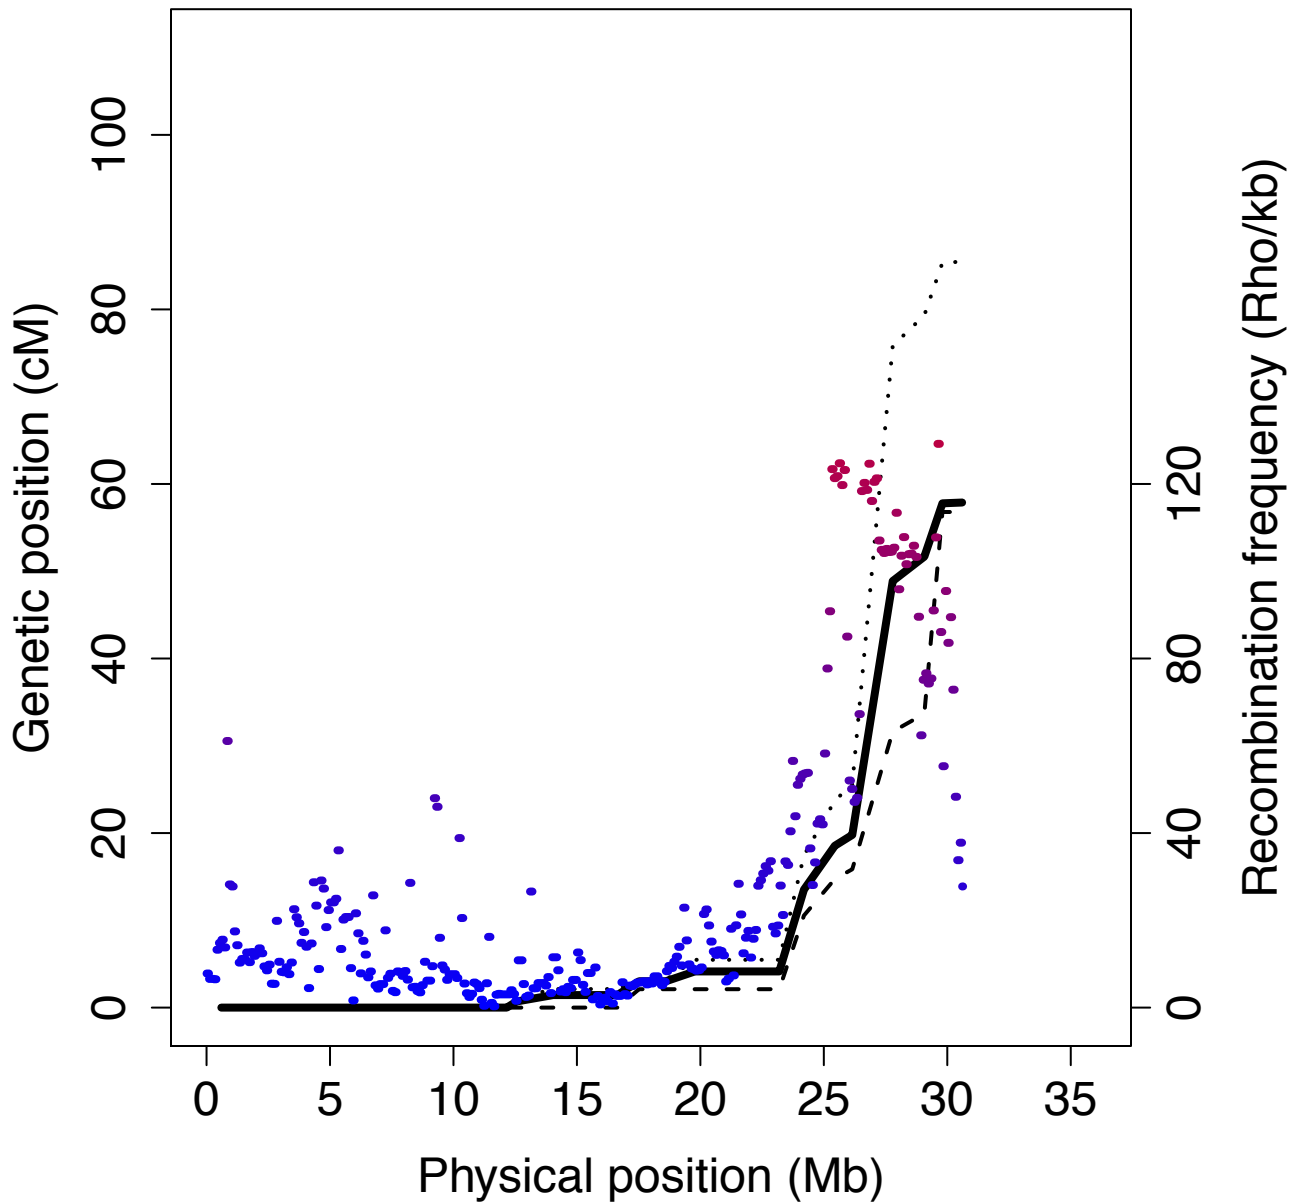

# Chromosome 9

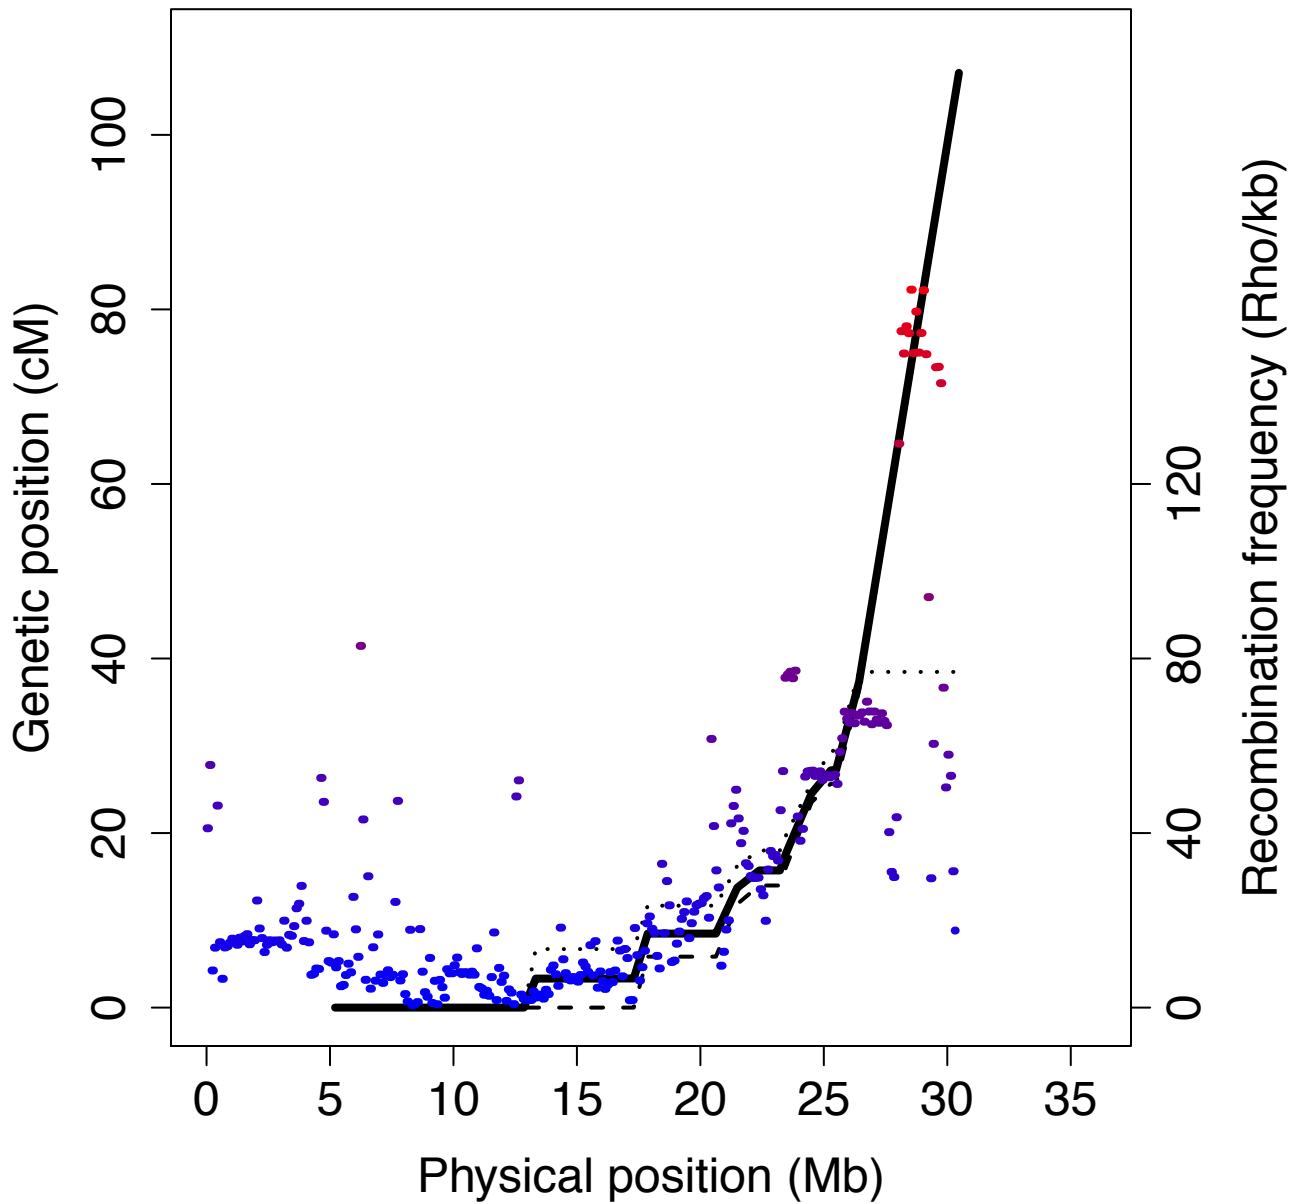

# Chromosome 10

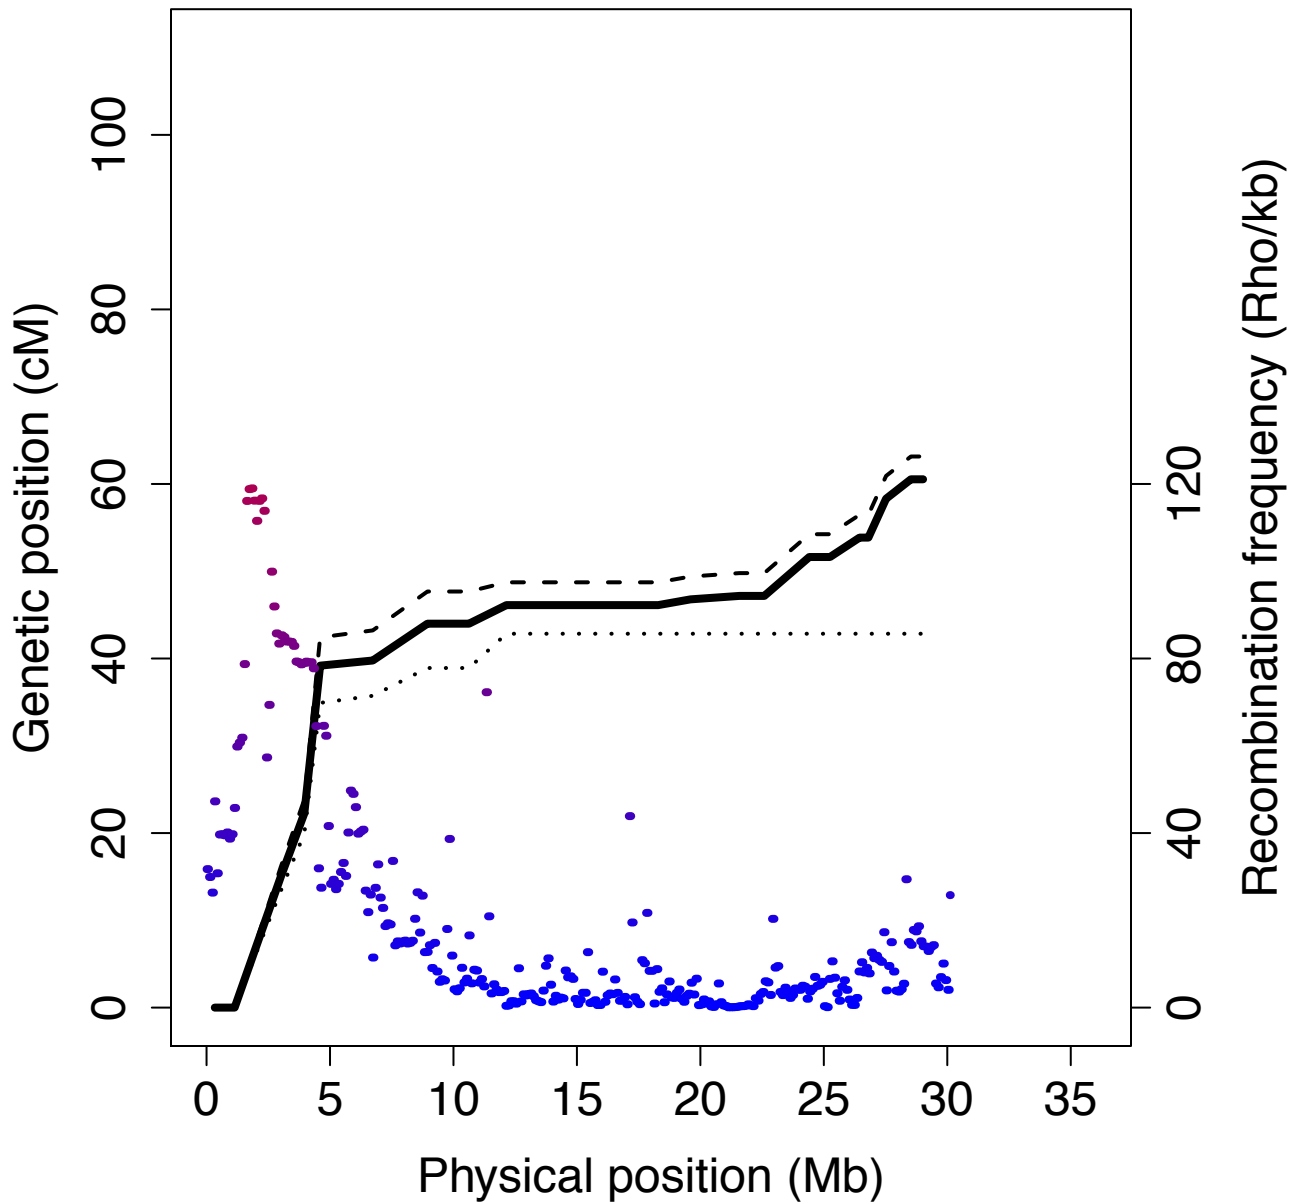

# Chromosome 11

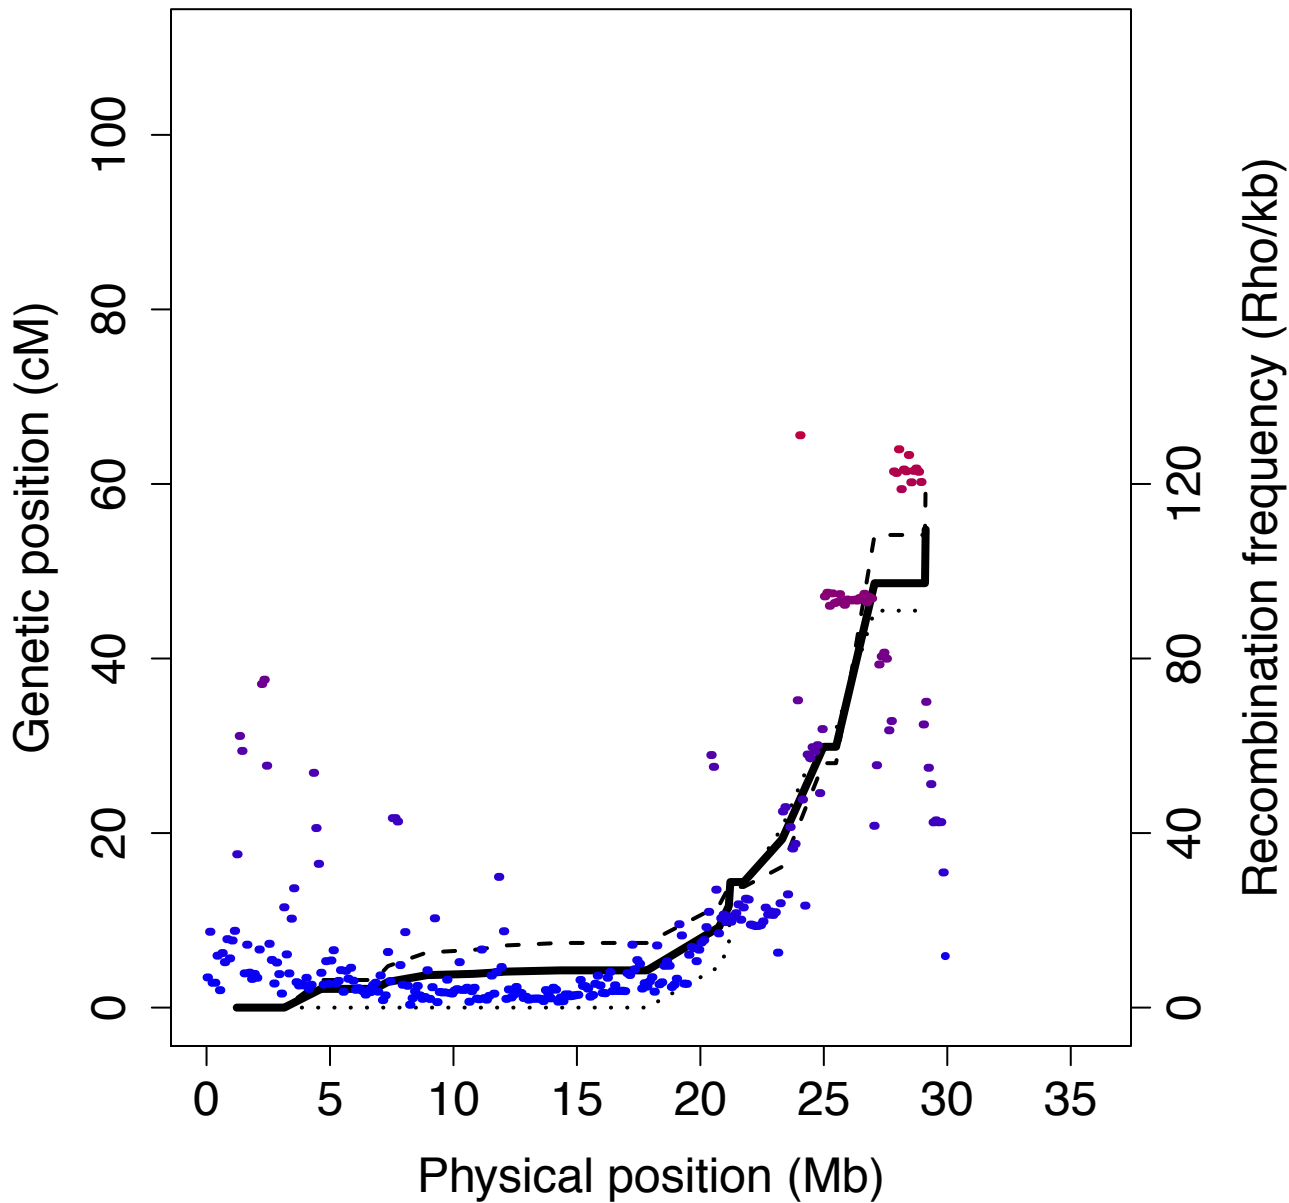

# Chromosome 12

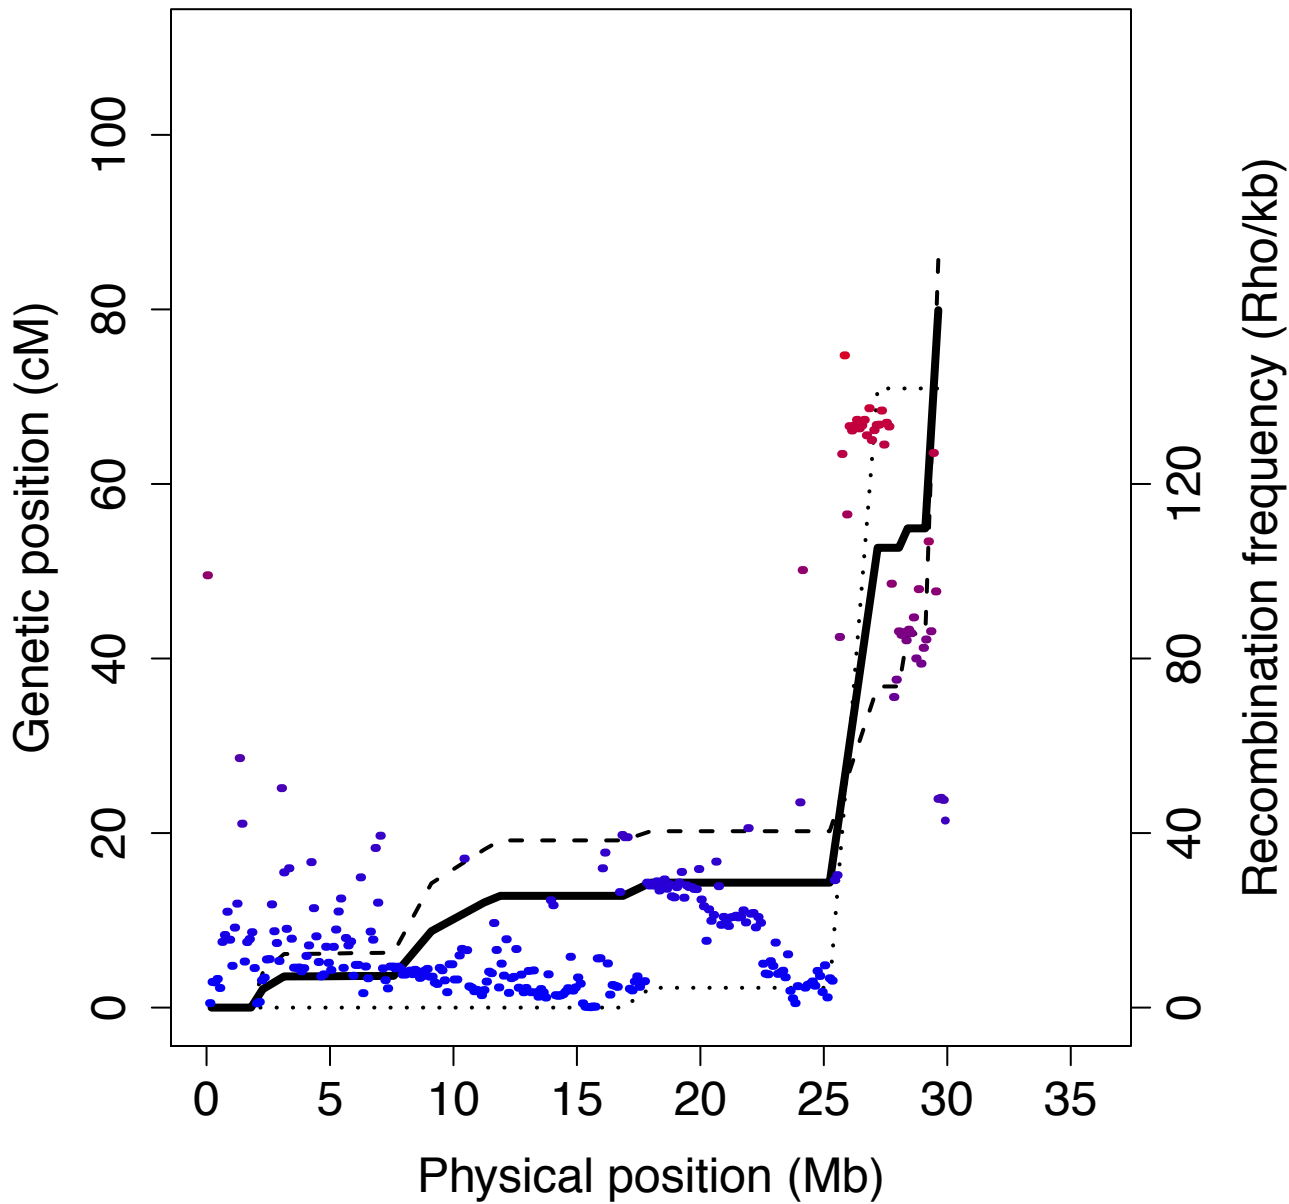

# Chromosome 13

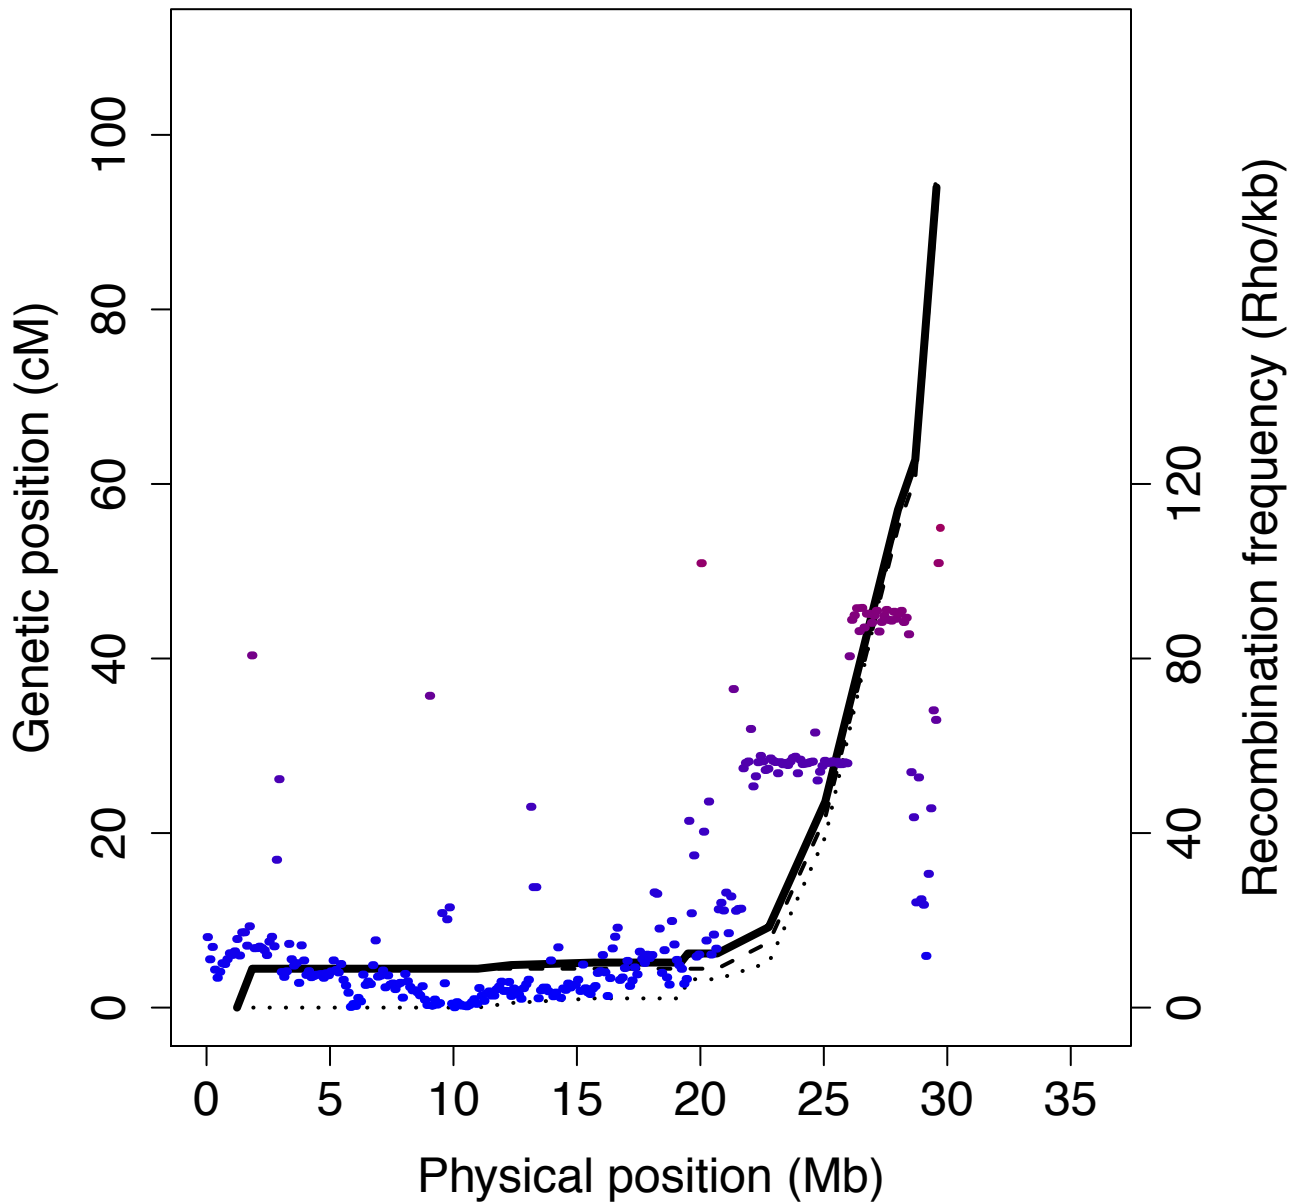

# Chromosome 14

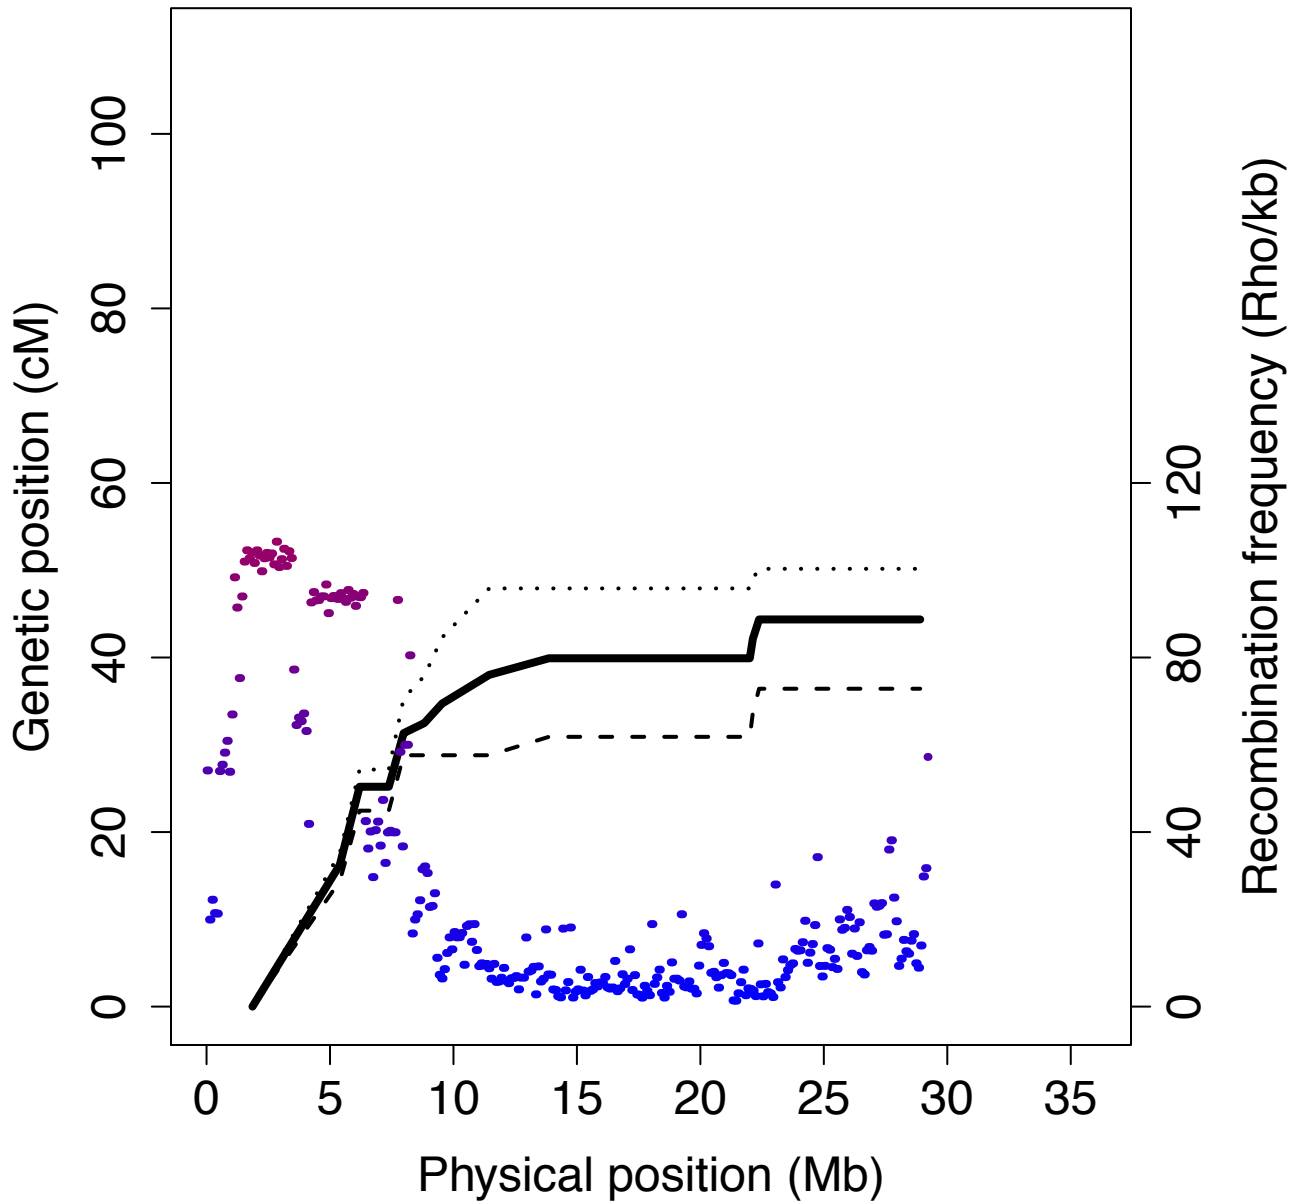

# Chromosome 15

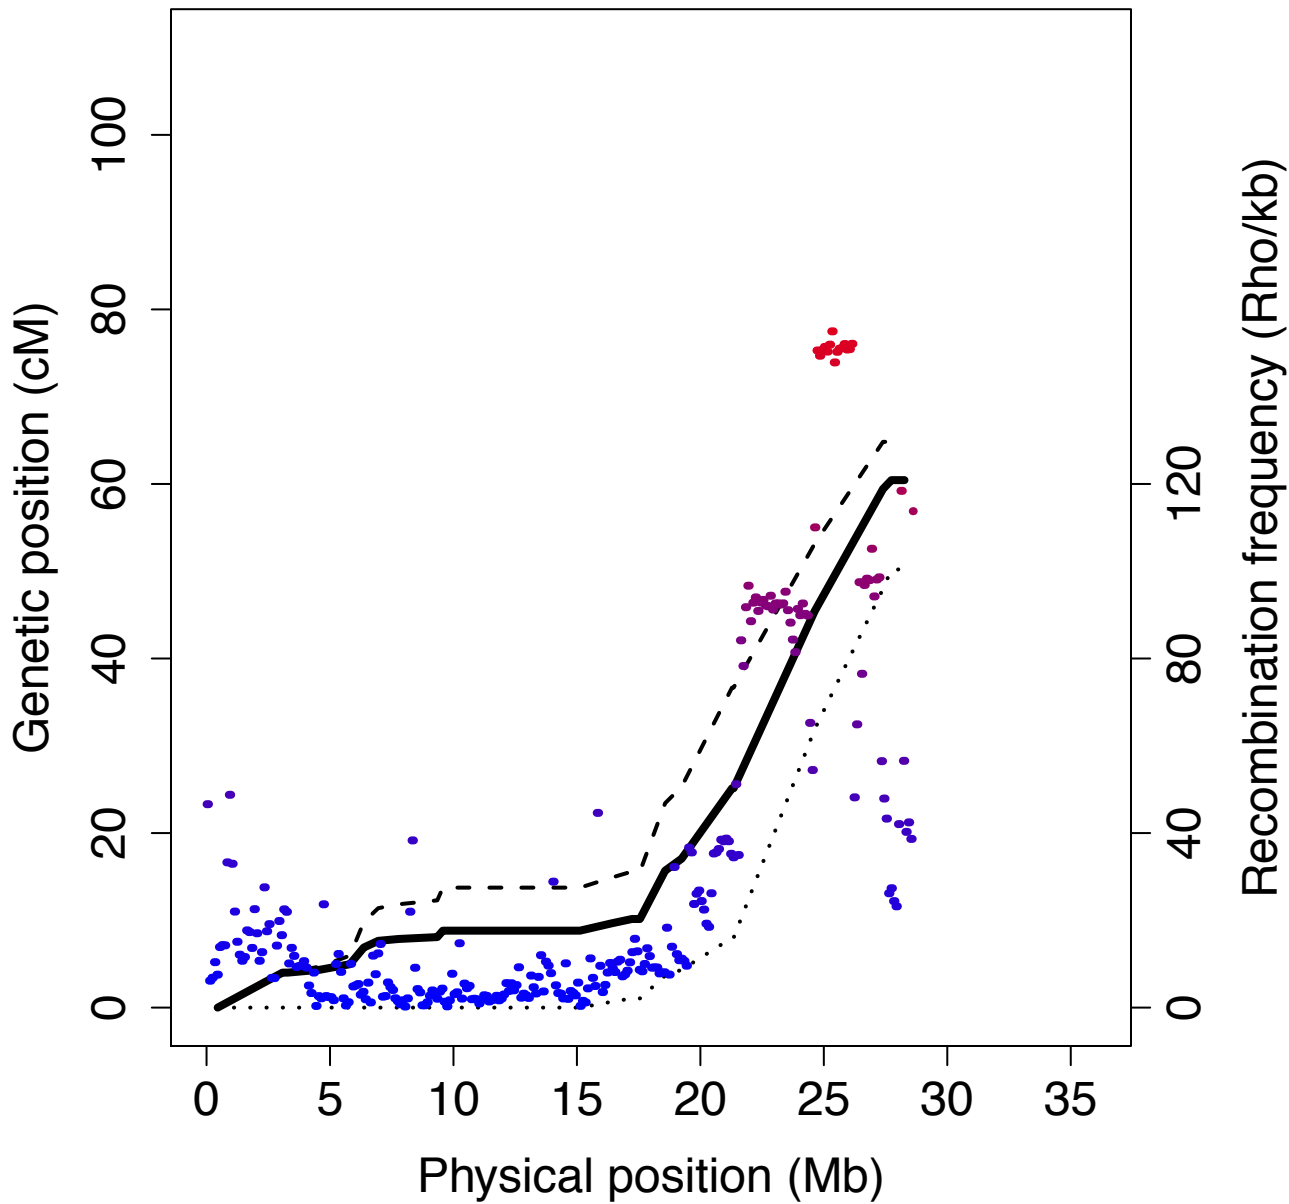



# Chromosome 16

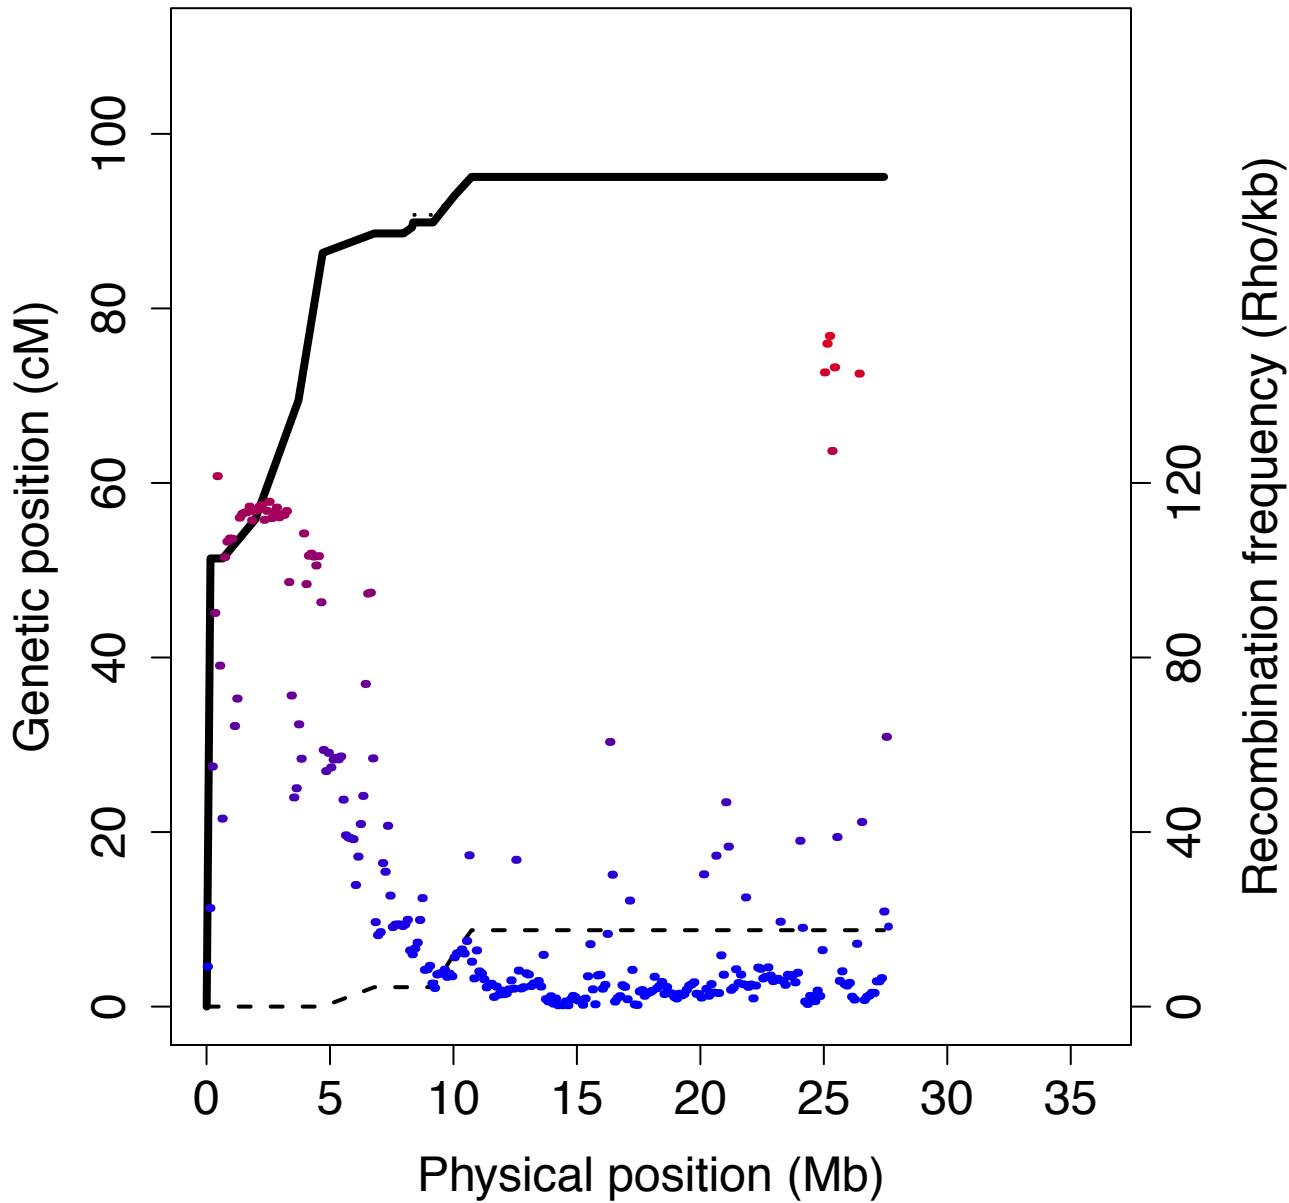

# Chromosome 17

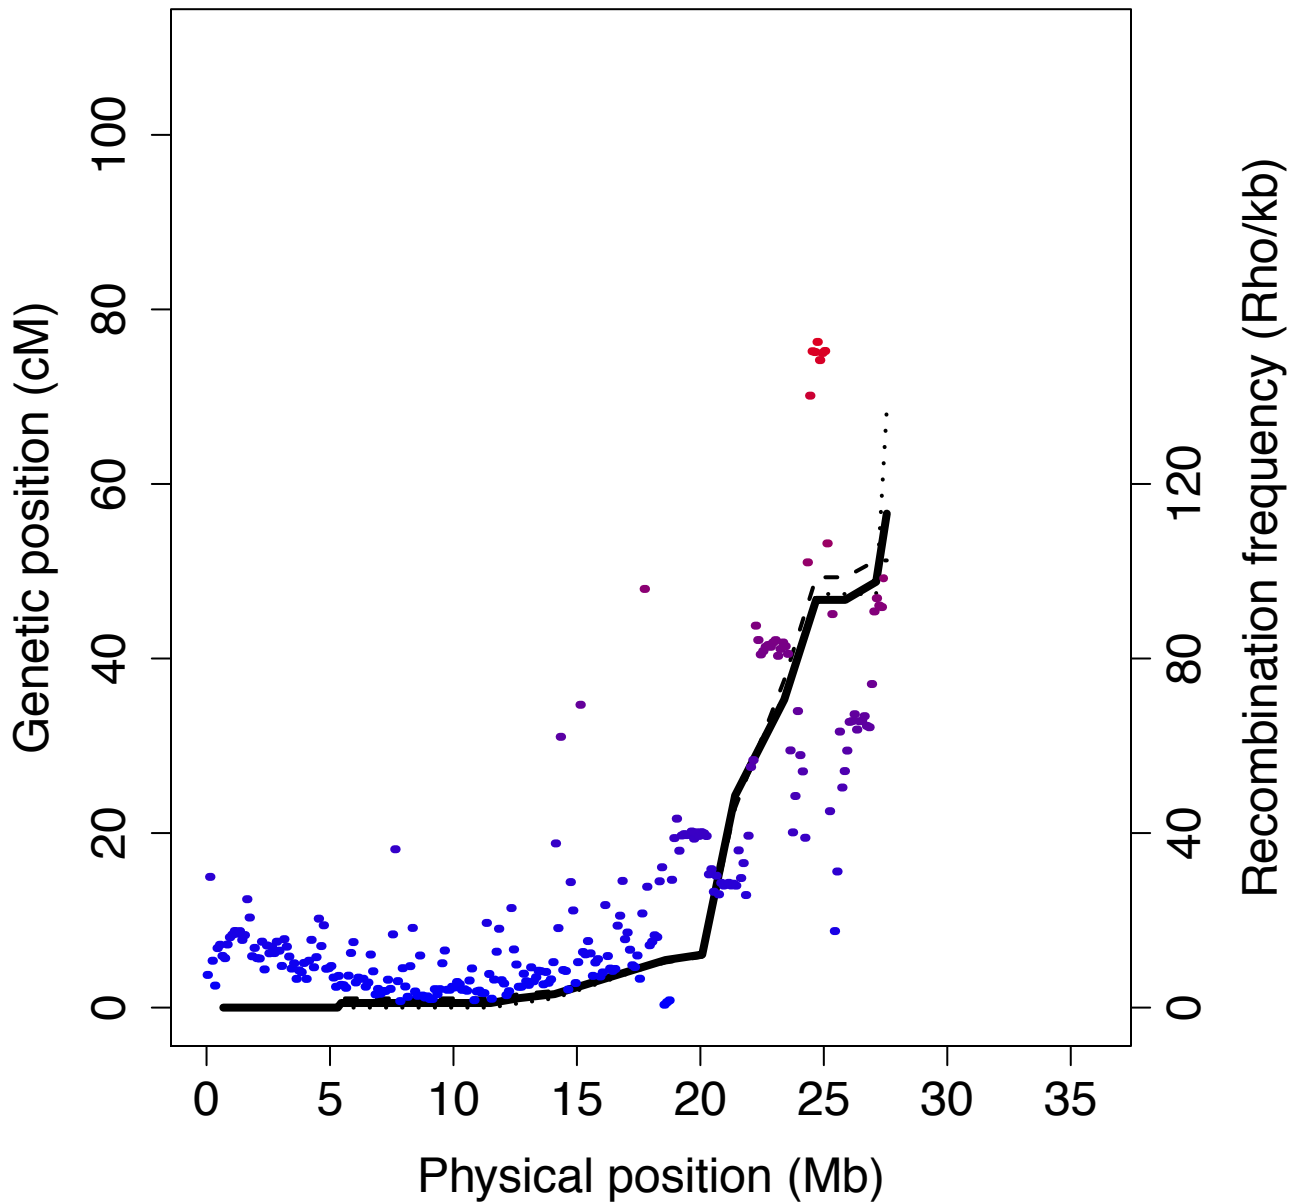

# Chromosome 18

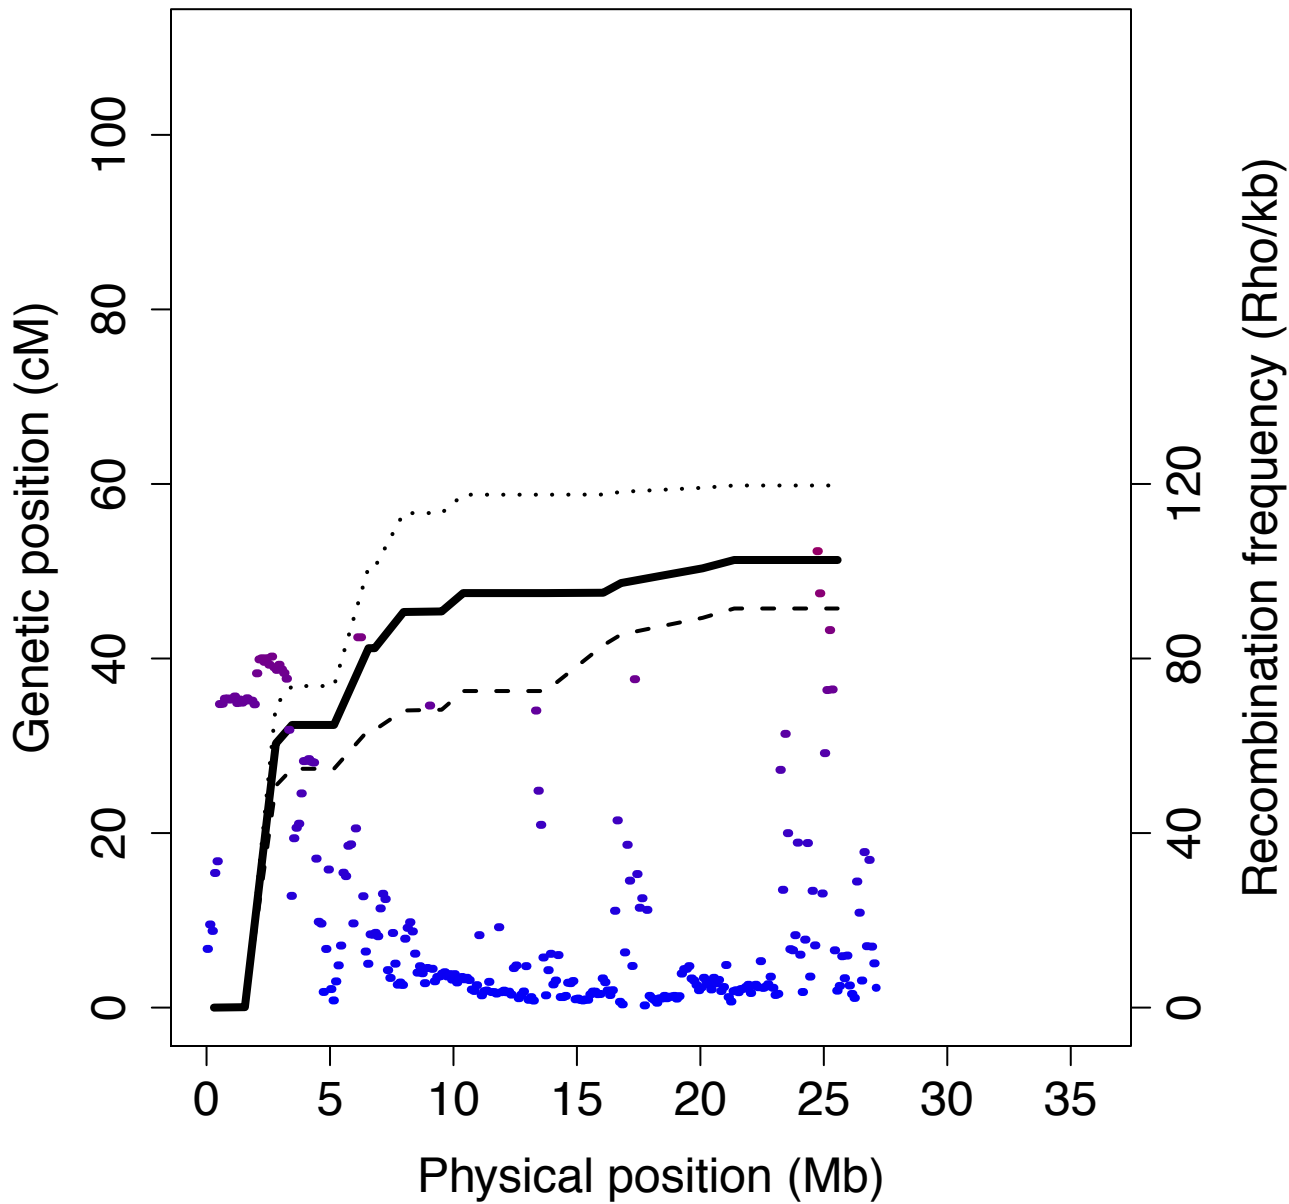

# Chromosome 19

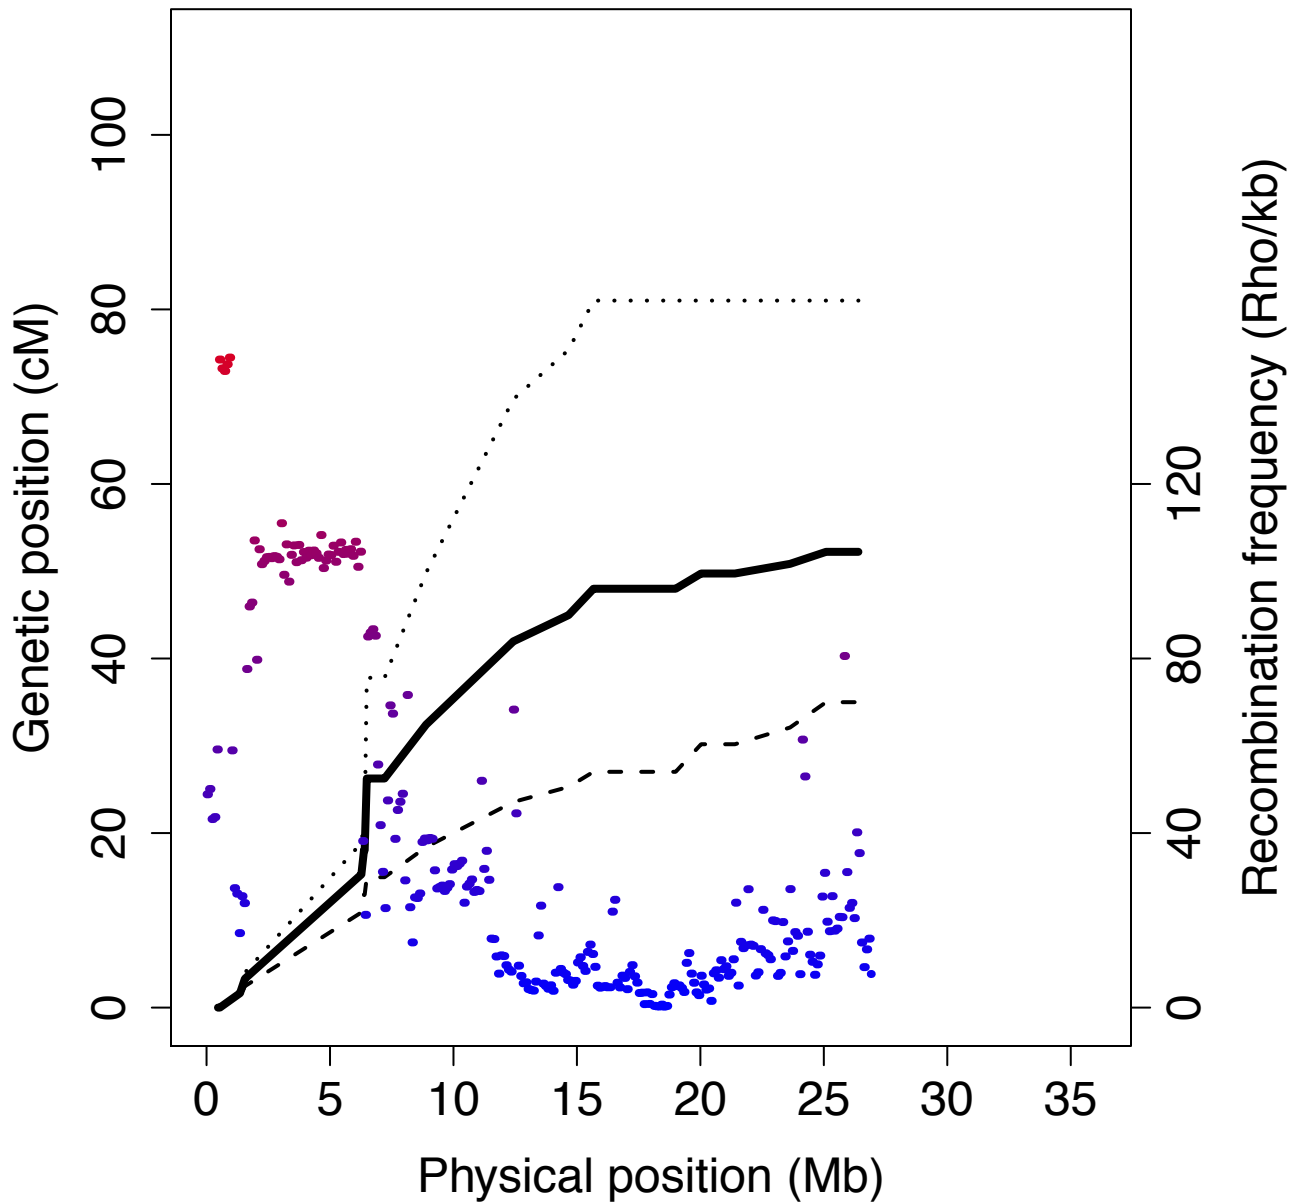

# Chromosome 20

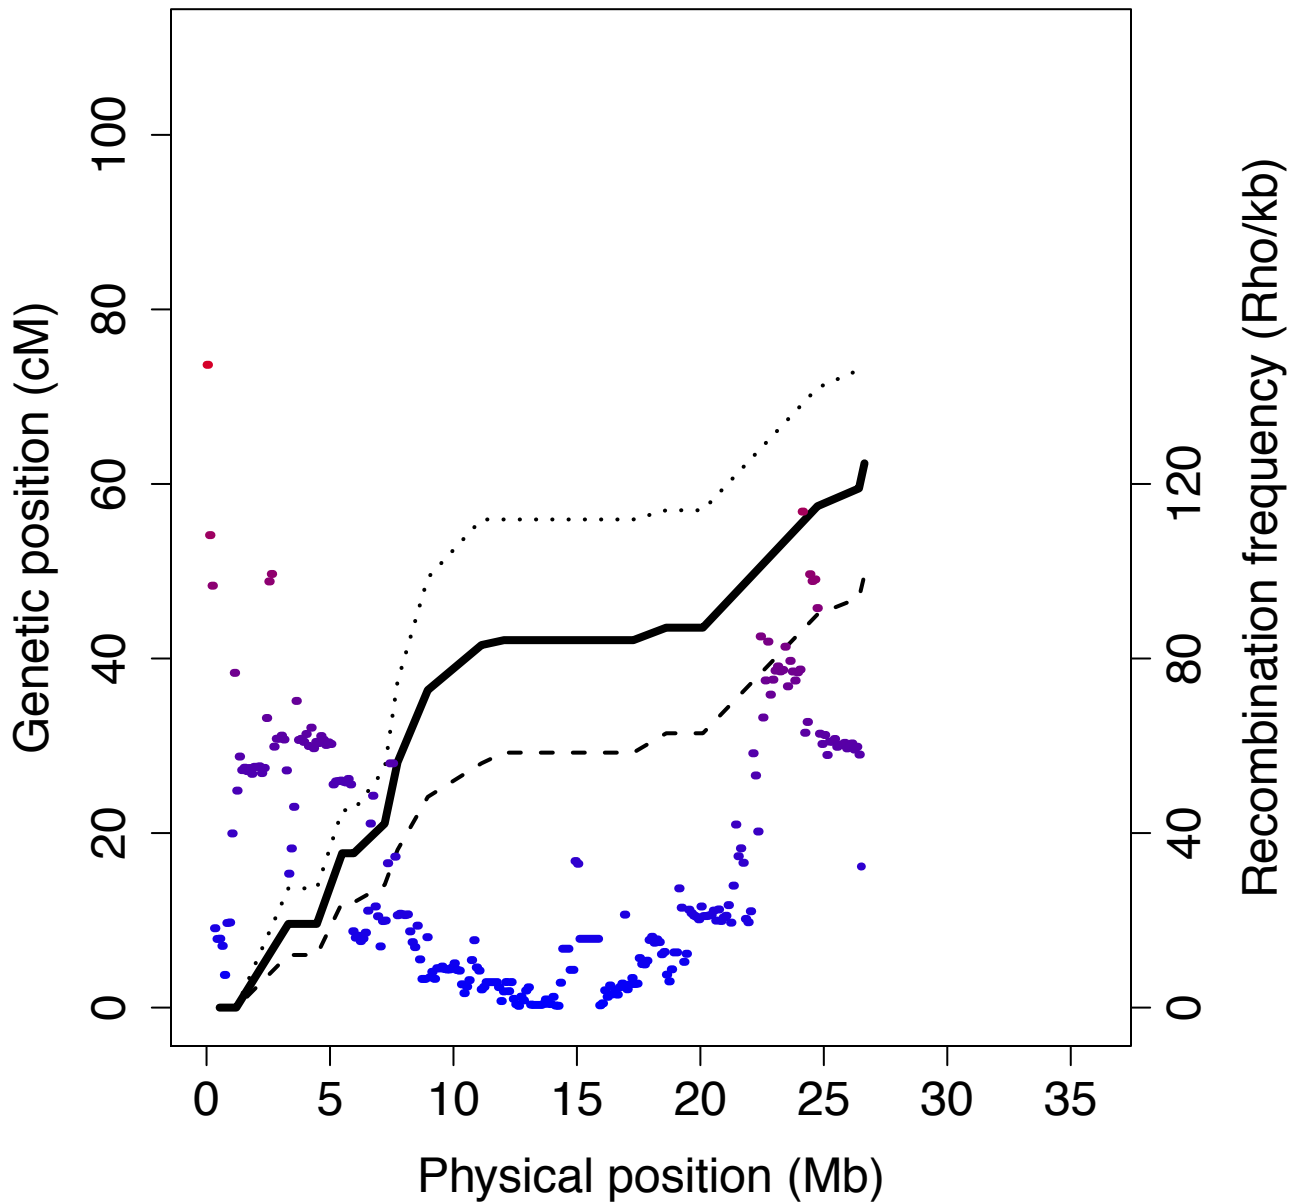

# Chromosome 21

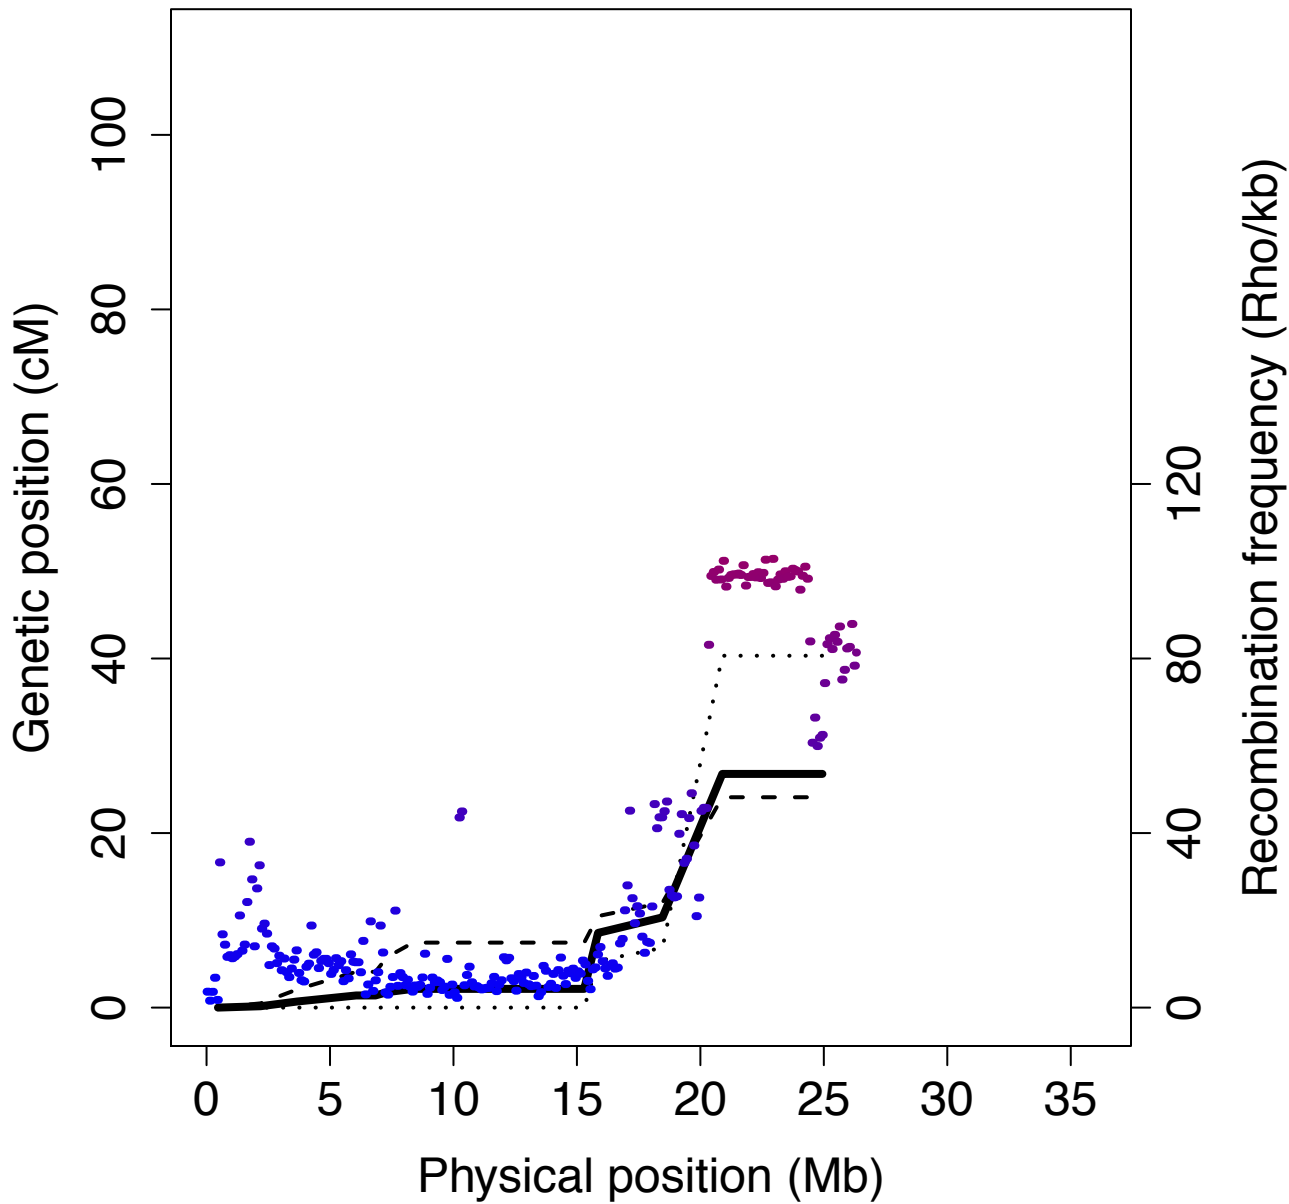

# Chromosome 22

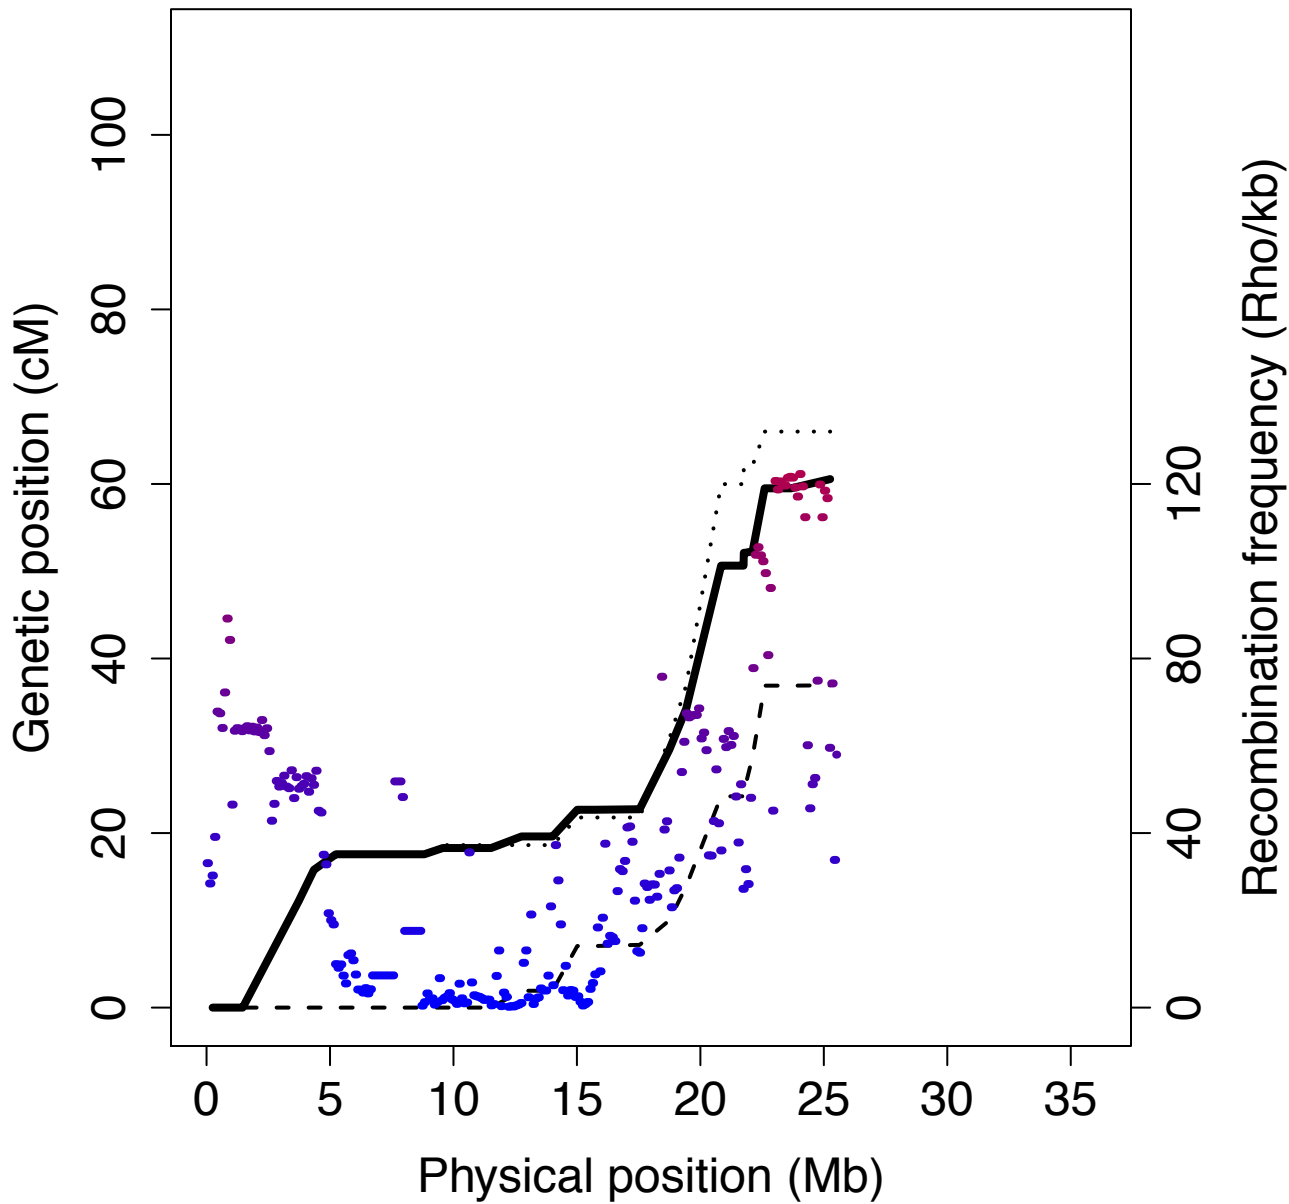

# Chromosome 23

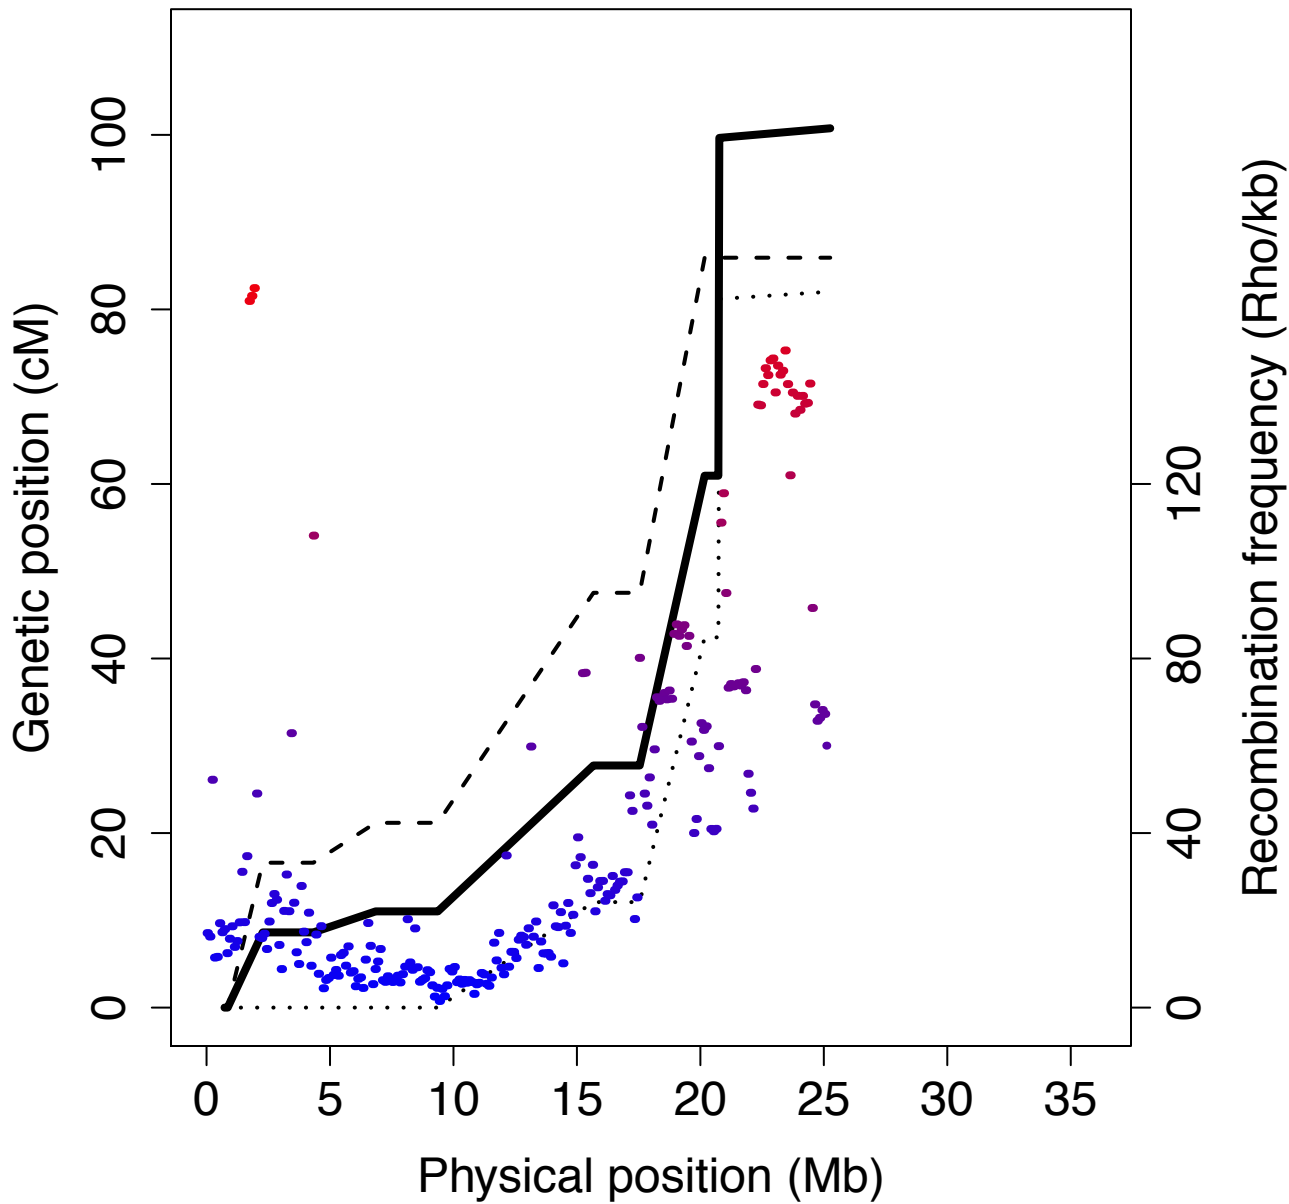



# Chromosome 24

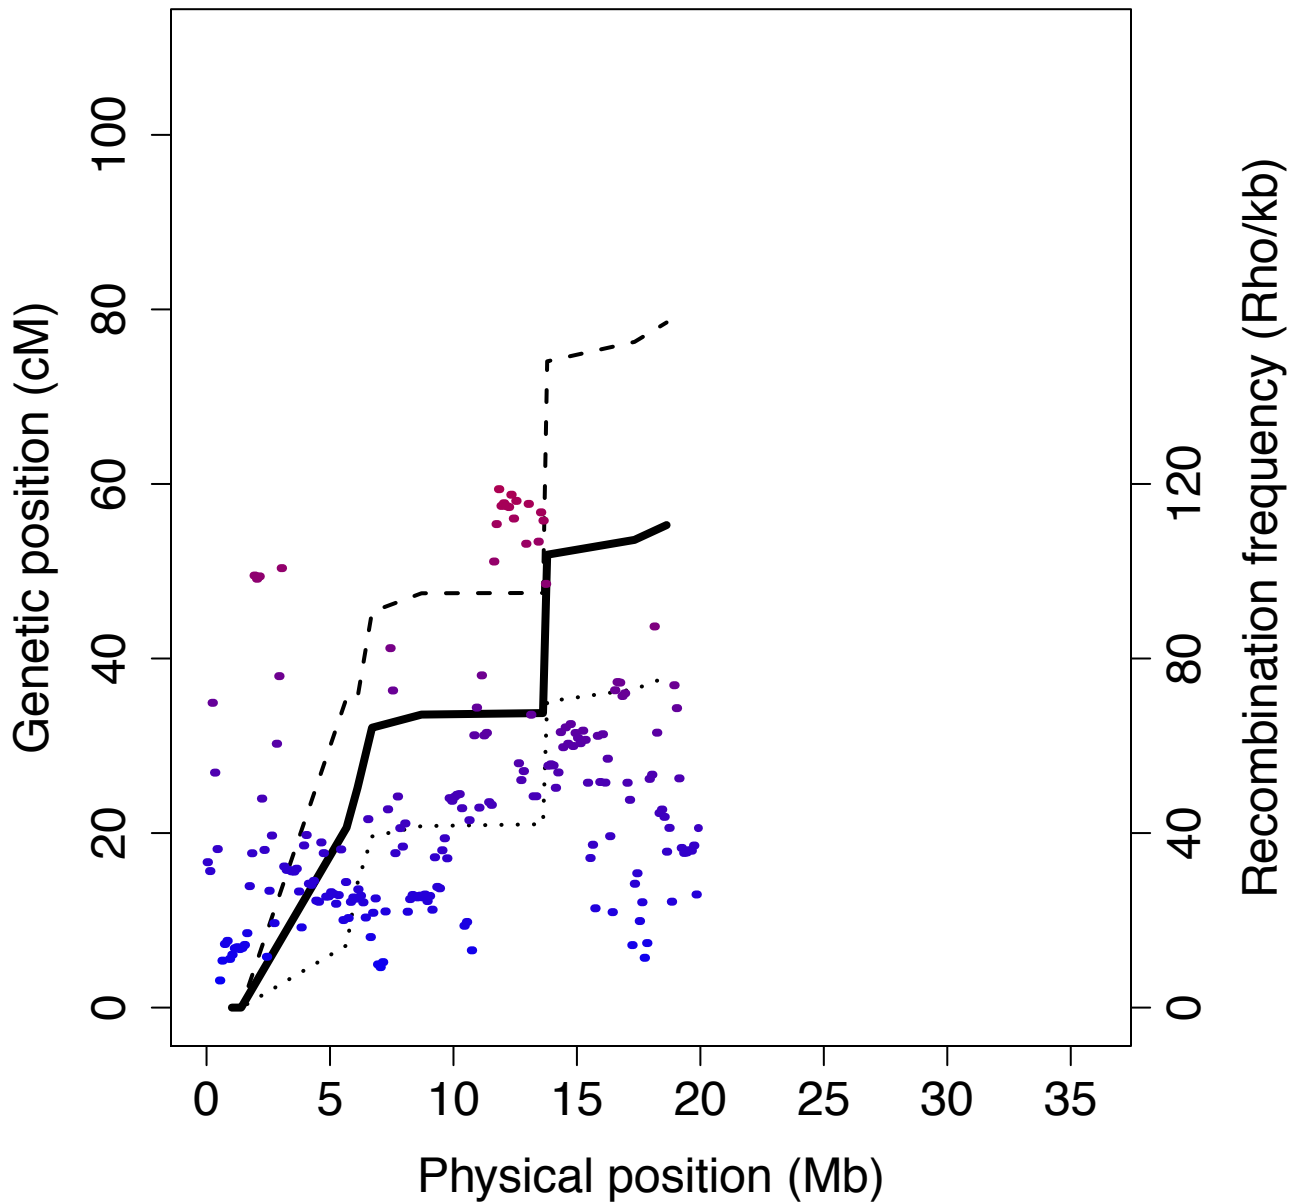

# Chromosome 25

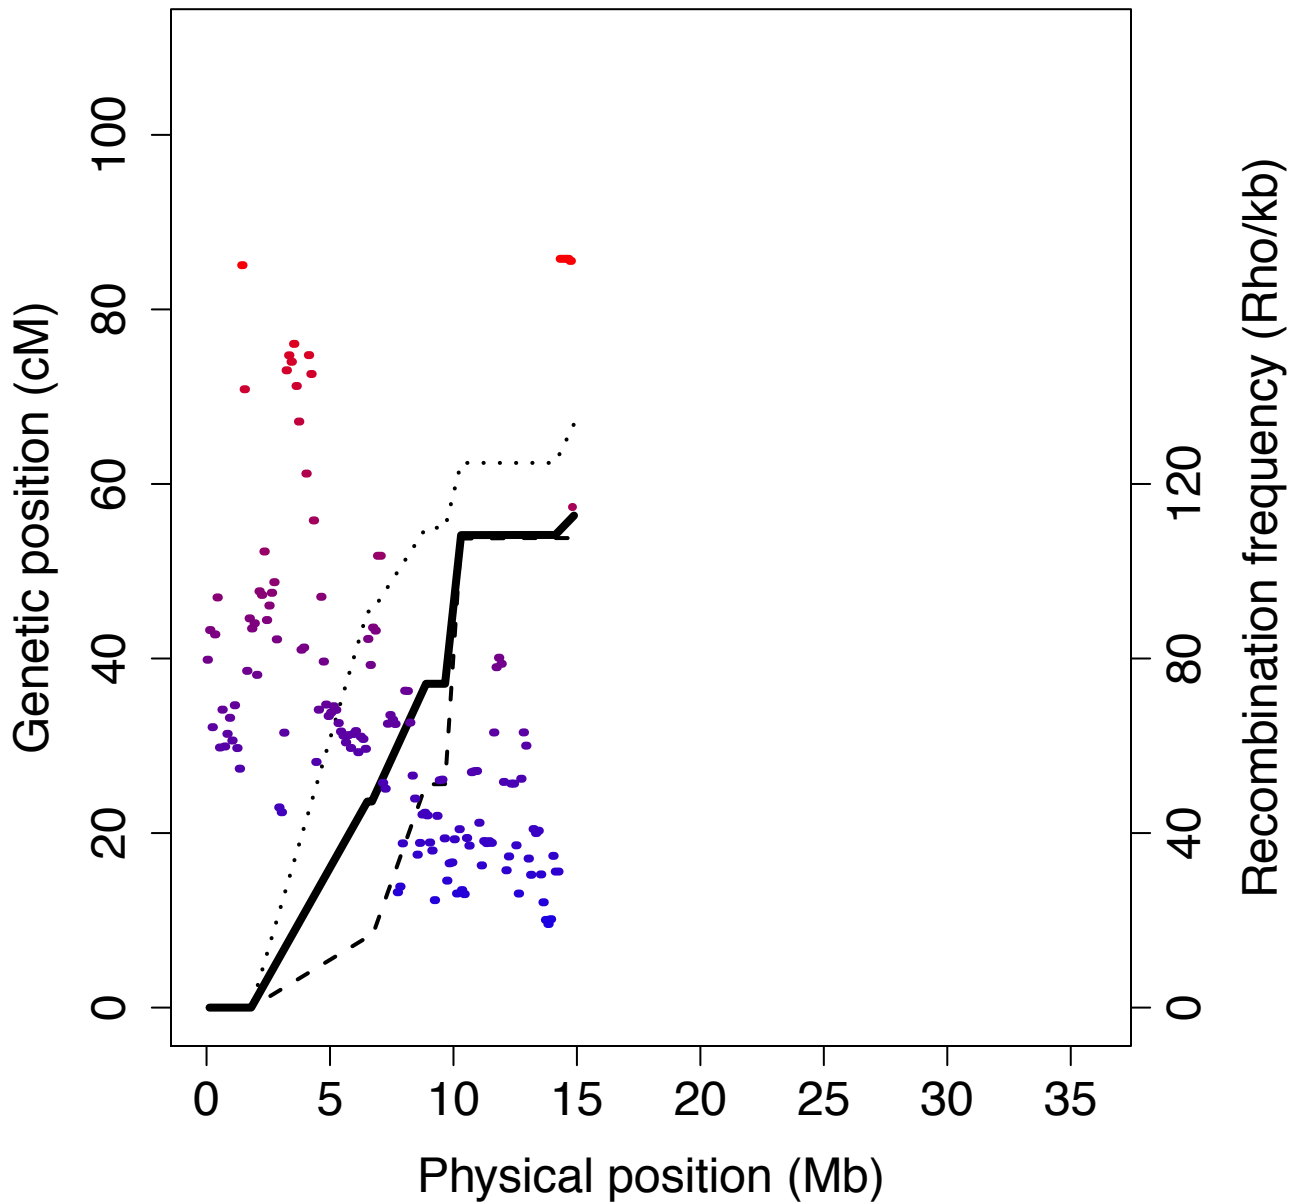

# Chromosome 26

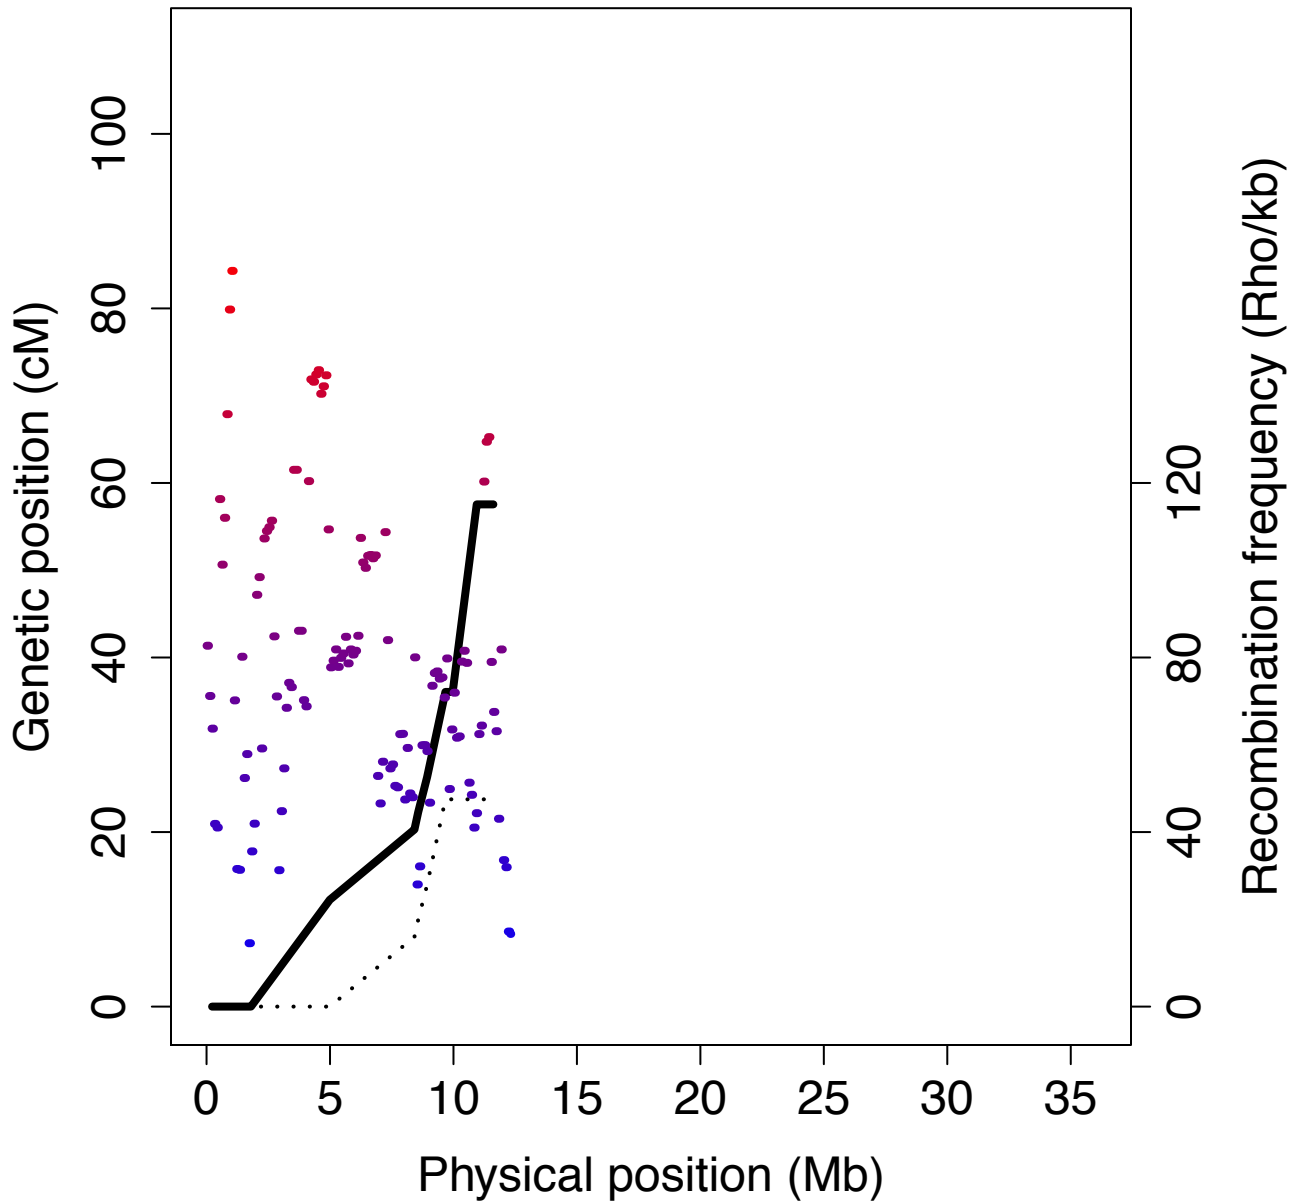

Supplement: supp_gr.253435.119_Supplemental_Figure_S1.pdf [file supp_gr.253435.119_Supplemental_Figure_S1.pdf]
