# Supplementary material for: A chromosome-level assembly of the Atlantic herring genome—detection of a supergene and other signals of selection
Source: PubMed Central journal article supplement — Genome Res. 2019 Nov;29(11):1919–28. doi: 10.1101/gr.253435.119 (PMC6836730; doi:10.1101/gr.253435.119), 2019-11
Supplement: supp_gr.253435.119_Supplemental_Figure_S3.pdf [file supp_gr.253435.119_Supplemental_Figure_S3.pdf]

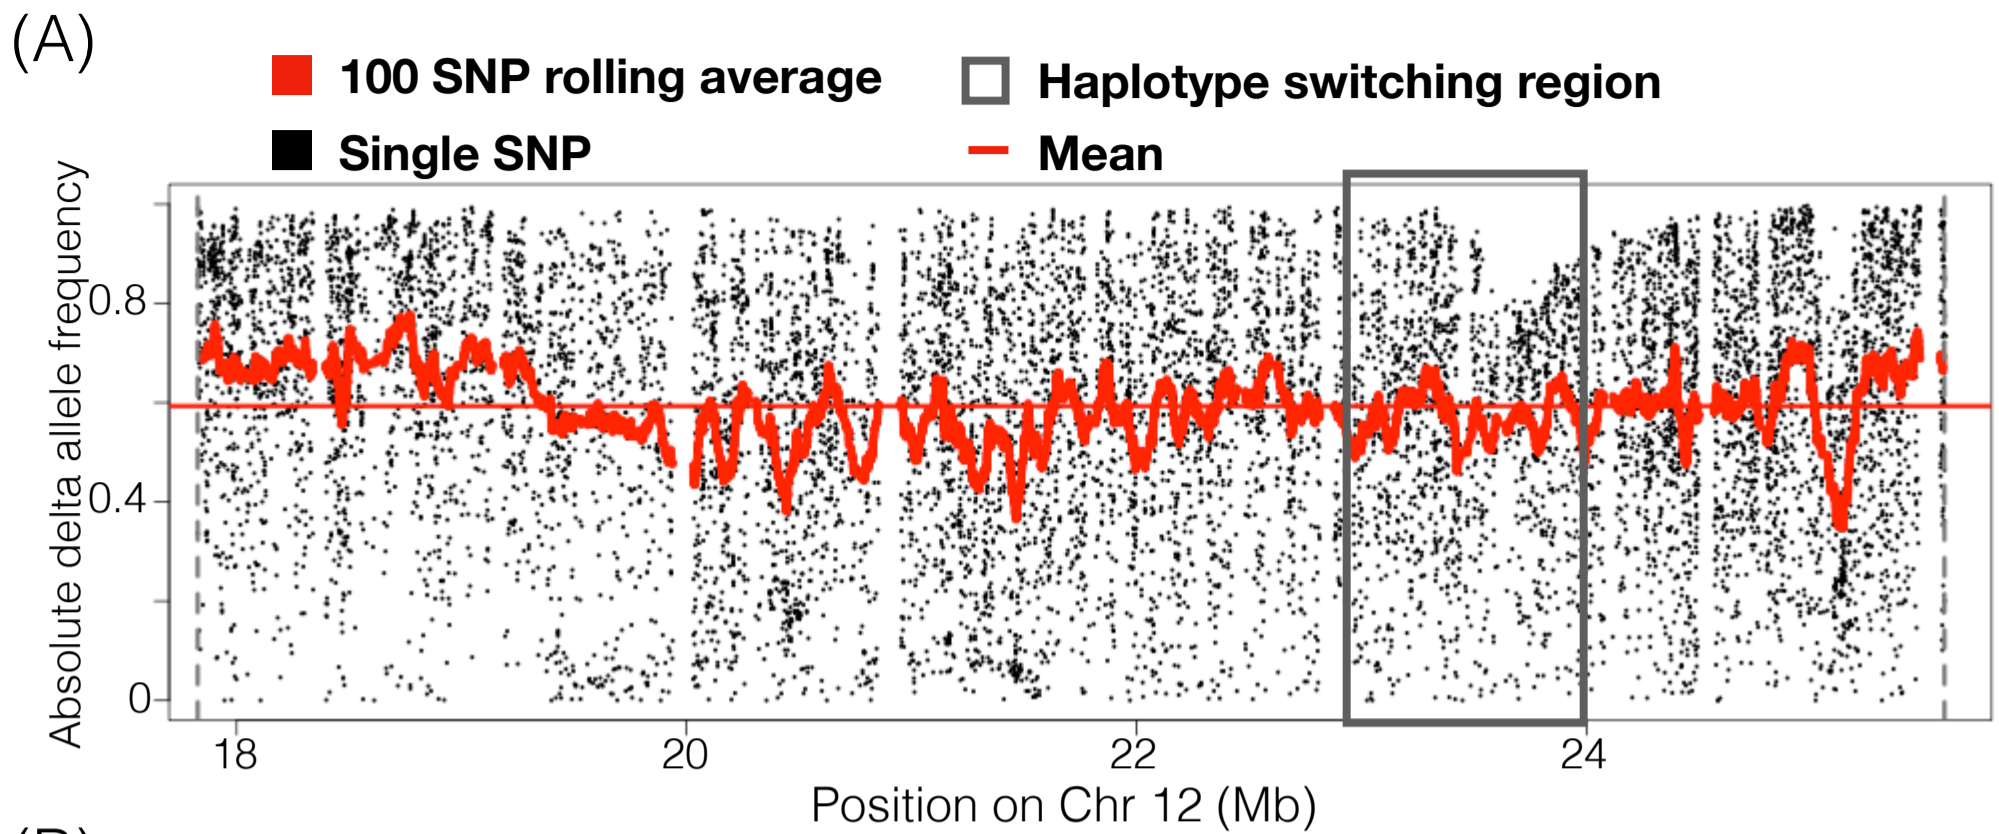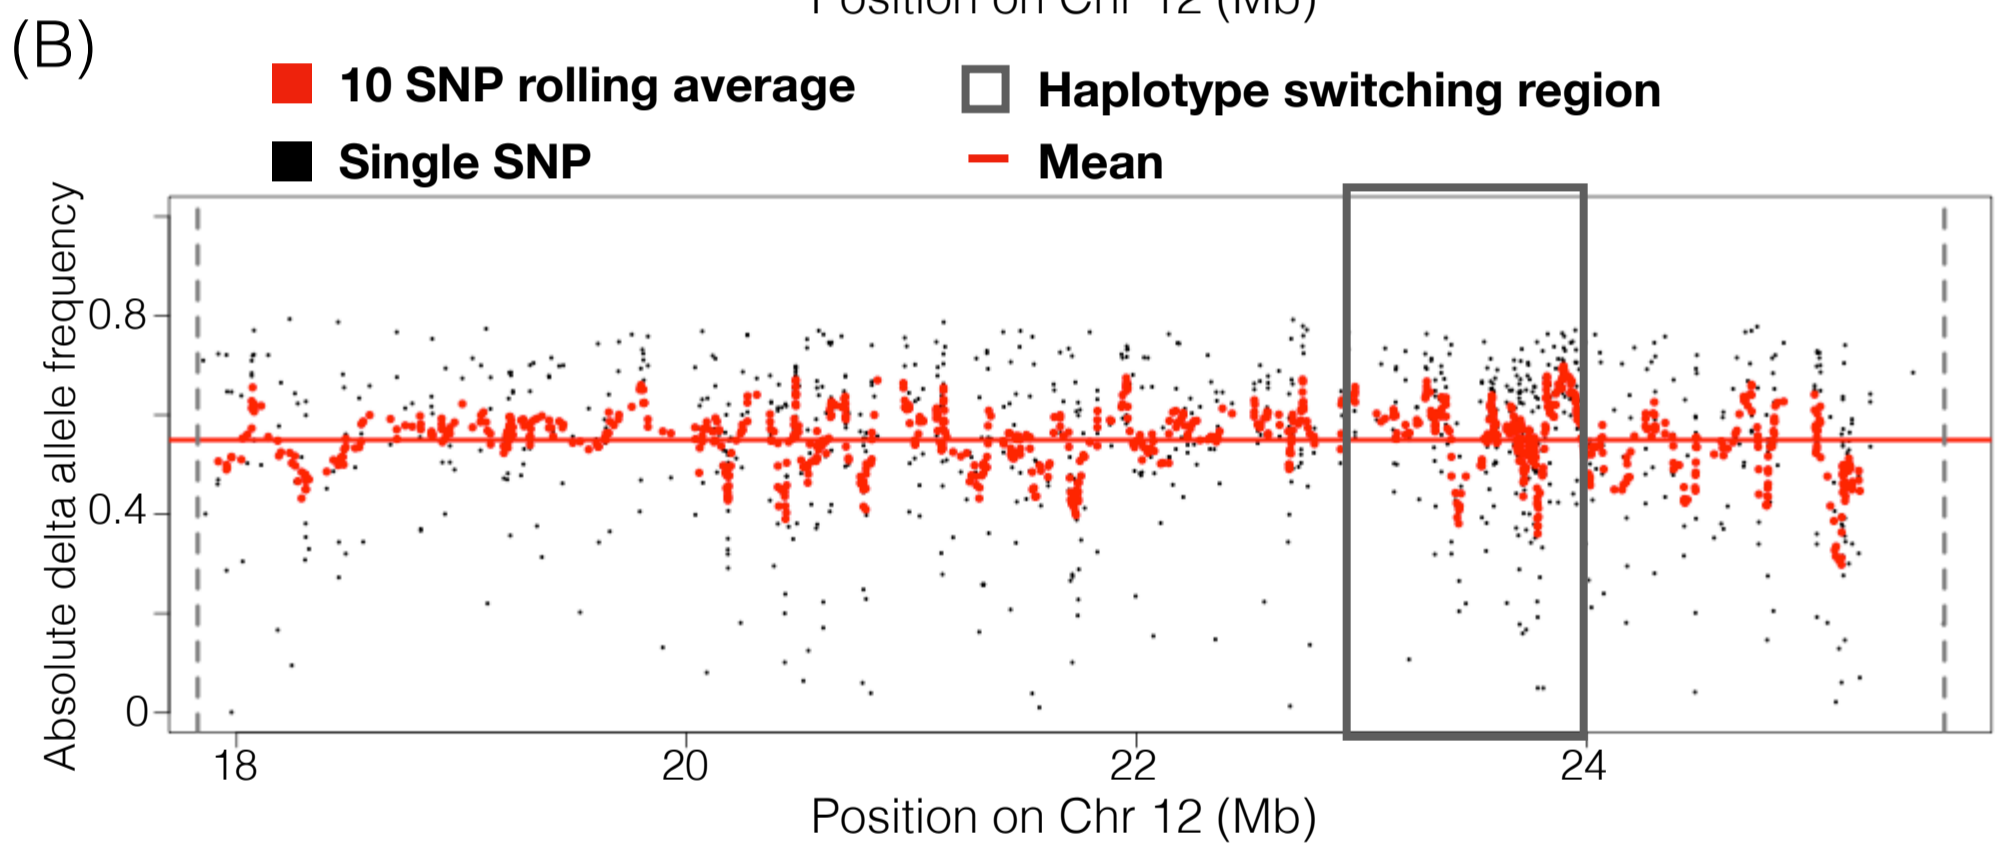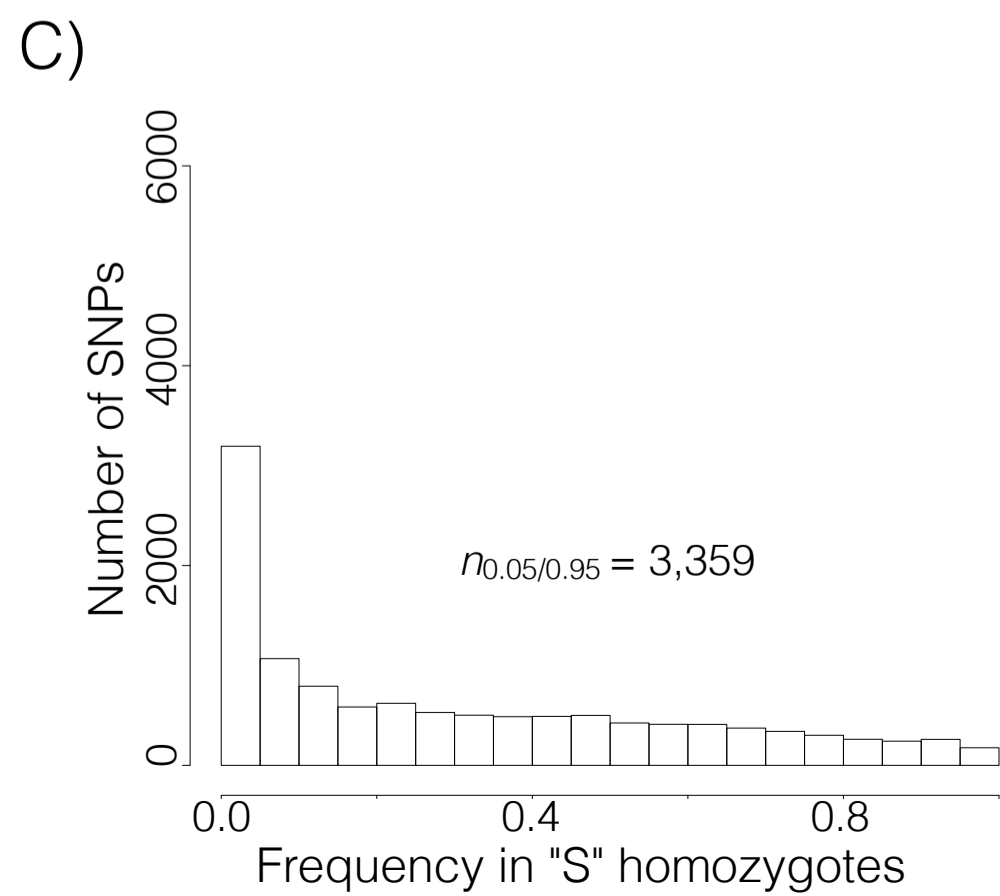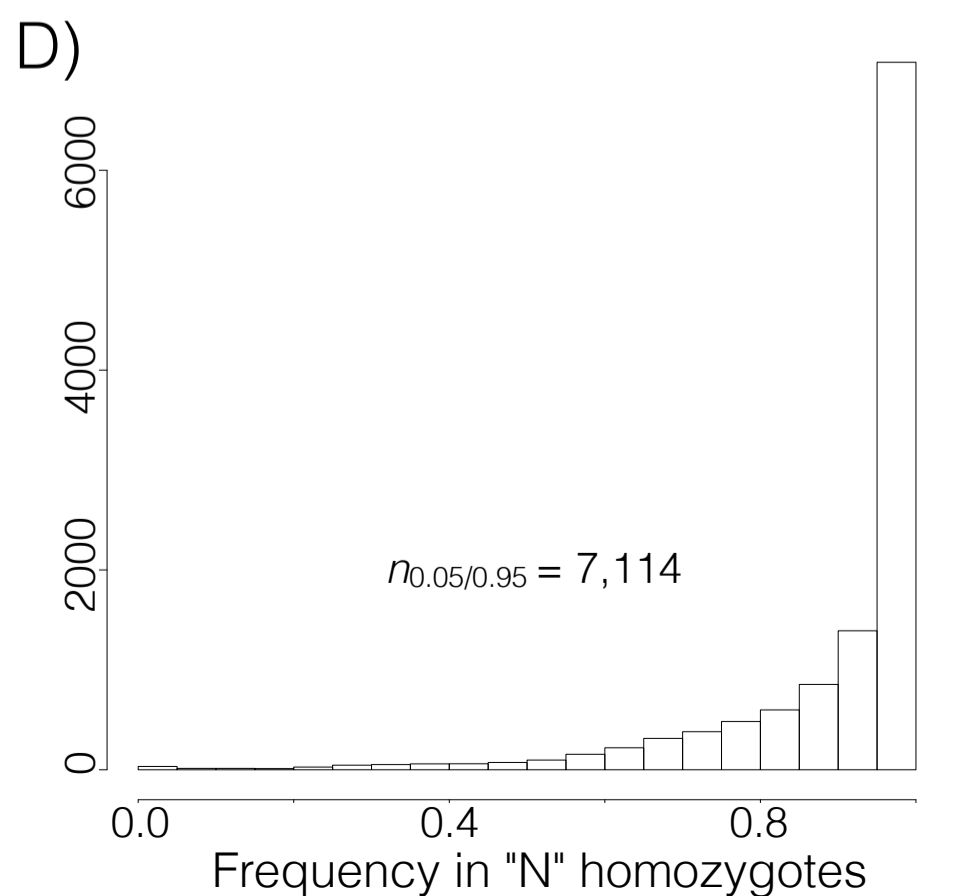

**Figure S3:** (A,B) Absolute difference in allele frequencies (delta allele frequencies) between NN and SS homozygotes for either all (A) or only shared (B) genotyped SNPs in the supergene region. The grey box indicates the region of haplotype switching described in the main text. (C,D) Histograms of SNP allele frequency distributions in SS (C) and NN (D) homozygotes. As was done in main Figure 6A, all frequencies are expressed in terms of the allele that is more common in the “N-” context than in the “S-” context. The  $n_{0.5/0.95}$  labels indicate the total number of loci with minor allele frequency  $\leq 5\%$ .
