# Supplementary material for: A chromosome-level assembly of the Atlantic herring genome—detection of a supergene and other signals of selection
Source: HighWire-hosted journal article supplement (doi:10.1101/gr.253435.119), 2019-10-24
Supplement: Supplemental_Table_S4.xlsx [file Supplemental_Table_S4.xlsx]

## Sheet: Sheet1
	Supplementary Table S4: Primers used for validation of the TSHR gene model.
	Primer name	Forward (5' to 3')	Reverse (5' to 3')	Utilization
	5' RACE Outer Primer	GCTGATGGCGATGAATGAACACTG	GGTTGCAGGAAAAGTTGGGATA	Outer 5' RLM-RACE PCR
	5' RACE Inner Primer	CGCGGATCCGAACACTGCGTTTGCTGGCTTTGATG	AAAGTGCTGGACAGGTTGAGTT	Inner 5' RLM-RACE PCR
	3' RACE Outer Primer	ACAACCCCAACTACCCCTCT	GCGAGCACAGAATTAATACGACT	Outer 3' RLM-RACE PCR
	3' RACE Inner Primer	AAGAGATGCCCATCCACTTG	CGCGGATCCGAATTAATACGACTCACTATAGG	Inner 3' RLM-RACE PCR
	TSHR-CDS Outer Primer	CCAAGTTCTCCTCGTTTTCACT	GCAAAGAAATGCAAAGGAAACT	Amplify the full-length coding region
	TSHR-CDS Inner Primer	GCGATAAGCCCTACTTTTTCAA	GGTTAAGCTCGCATTGTCATTC	Amplify the full-length coding region
	TSHR-CDS-seq 1	GCGATAAGCCCTACTTTTTCAA		Sanger sequence the amplified PCR product
	TSHR-CDS-seq 2	GGCTTCACAGAAATCCAAAGC		Sanger sequence the amplified PCR product
	TSHR-CDS-seq 3	GAGTCGTTACGGGAACTCAAAG		Sanger sequence the amplified PCR product
	TSHR-CDS-seq 4	GACATGTGCATGGGGATCTAC		Sanger sequence the amplified PCR product
	TSHR-CDS-seq 5	ACAACCCCAACTACCCCTCT		Sanger sequence the amplified PCR product
